# Supplementary material
Source: publisher figshare collection journal article supplement (https://tandf.figshare.com/articles/dataset/_/4528016)
Supplement: Supplementary file 1 [file 2]

# A Cross-Entropy Approach to the Estimation of Generalised Linear Multilevel Models

Marco Bee\*, Giuseppe Espa<sup>†</sup>,  
Diego Giuliani<sup>‡</sup>, Flavio Santi<sup>§</sup>

## Supplementary Material

The present document includes the following tables and figures:

- **Tables SM.1-SM.6** – RMSE and computing times about simulations on the 2-level logistic model (1) with  $\Omega = \sigma^2 I$ . – Parameters  $N$  and  $\rho$  (Section 3.4.1 of the paper).
- **Tables SM.7-SM.12** – RMSE and computing times about simulations on the 2-level Poisson model (3) with  $\Omega = \sigma^2 I$ . – Parameters  $N$  and  $\rho$  (Section 3.4.1 of the paper).
- **Tables SM.13-SM.29** – RMSE, bias and computing times about simulations on the 2-level logistic model (1) with  $\Omega = \Xi \otimes I_G$ . Only RMSE for  $\hat{\beta}_j$  ( $j = 1, \dots, k_1$ ) and  $\hat{\sigma}_j$  ( $j = 1, \dots, k_2$ ) are reported. – Parameters  $N$  and  $\rho$  (Section 3.4.1 of the paper).
- **Tables SM.30-SM.35** – RMSE and computing times about simulations on the 2-level logistic model (1) with  $\Omega = \sigma^2 I$ . – Parameters  $\beta$  and  $q$  (Section 3.4.3 of the paper).
- **Tables SM.36-SM.51** – RMSE, bias and computing times about the simulations for the comparison between the cross-entropy and the AGQ estimates – For  $G = 8, 12, 25, 50$  and  $n = 250, 1000$  (Section 4 of the paper).
- **Figures SM.1-SM.15** – Boxplots of the point estimates about the simulations for the comparison between the cross-entropy and the AGQ estimates – For  $G = 50$  and  $n = 250$  (Section 4 of the paper).

---

\*Department of Economics and Management, University of Trento, Via Inama 5, 38122 Trento. E-mail: marco.bee@unitn.it.

<sup>†</sup>Department of Economics and Management, University of Trento, Via Inama 5, 38122 Trento. E-mail: giuseppe.espa@unitn.it.

<sup>‡</sup>Department of Economics and Management, University of Trento, Via Inama 5, 38122 Trento. E-mail: diego.giuliani@unitn.it.

<sup>§</sup>Department of Economics and Management, University of Trento, Via Inama 5, 38122 Trento. E-mail: flavio.santi@unitn.it.

| $N$    | $\rho$ |       |       |       |       |       |       |       |       |       |
|--------|--------|-------|-------|-------|-------|-------|-------|-------|-------|-------|
|        | 0.01   | 0.02  | 0.03  | 0.04  | 0.05  | 0.06  | 0.07  | 0.08  | 0.09  | 0.10  |
| 100    | 27.56  | 32.48 | 25.54 | 28.68 | 31.28 | 26.67 | 31.64 | 39.55 | 42.27 | 41.50 |
| 180    | 24.30  | 23.56 | 25.16 | 24.20 | 25.72 | 28.15 | 28.35 | 28.54 | 30.51 | 33.30 |
| 320    | 25.83  | 23.52 | 23.57 | 24.12 | 23.50 | 23.57 | 24.24 | 27.60 | 28.62 | 30.15 |
| 560    | 23.98  | 24.01 | 23.94 | 24.77 | 23.49 | 24.27 | 24.73 | 25.79 | 27.19 | 29.07 |
| 1000   | 24.61  | 23.87 | 24.06 | 23.20 | 24.00 | 24.63 | 25.26 | 25.65 | 27.29 | 29.29 |
| 1800   | 23.30  | 23.41 | 23.62 | 24.20 | 24.03 | 24.01 | 24.62 | 25.62 | 26.43 | 26.60 |
| 3200   | 24.46  | 23.05 | 23.44 | 23.67 | 23.50 | 24.03 | 24.30 | 25.67 | 25.75 | 27.07 |
| 5600   | 23.62  | 23.56 | 23.76 | 23.35 | 23.65 | 23.83 | 24.60 | 25.07 | 26.31 | 27.75 |
| 10 000 | 23.92  | 23.50 | 23.50 | 23.55 | 23.84 | 24.05 | 24.32 | 25.00 | 25.88 | 27.00 |
| 18 000 | 23.92  | 23.36 | 23.47 | 23.49 | 23.64 | 23.82 | 24.28 | 24.97 | 25.64 | 26.90 |
| 32 000 | 23.85  | 23.51 | 23.50 | 23.48 | 23.53 | 23.86 | 24.24 | 25.06 | 25.70 | 26.72 |
| 56 000 | 23.74  | 23.57 | 23.39 | 23.46 | 23.61 | 23.88 | 24.25 | 24.94 | 25.69 | 26.79 |

**Table SM.1:** Sample Root Mean Squared Error (RMSE) for  $\hat{\beta}_1$  of model (1) obtained by means of Monte Carlo simulations for various values of the number of points ( $N$ ) and the rarity parameter ( $\rho$ ). For each pair ( $N, \rho$ ), the number of replications is equal to 50. All values of the RMSE are multiplied by 100.

| $N$    | $\rho$ |       |       |       |       |       |       |        |        |       |
|--------|--------|-------|-------|-------|-------|-------|-------|--------|--------|-------|
|        | 0.01   | 0.02  | 0.03  | 0.04  | 0.05  | 0.06  | 0.07  | 0.08   | 0.09   | 0.10  |
| 100    | 58.51  | 62.49 | 55.70 | 58.54 | 63.89 | 75.20 | 63.82 | 108.58 | 107.14 | 99.54 |
| 180    | 46.26  | 43.97 | 42.54 | 52.76 | 51.00 | 57.64 | 66.51 | 67.30  | 83.30  | 90.65 |
| 320    | 46.51  | 44.58 | 46.83 | 45.75 | 47.24 | 52.86 | 56.41 | 57.15  | 68.21  | 70.25 |
| 560    | 45.11  | 44.90 | 44.16 | 48.07 | 50.54 | 50.53 | 55.61 | 57.09  | 63.42  | 72.45 |
| 1000   | 44.69  | 43.84 | 44.21 | 45.10 | 47.43 | 50.86 | 52.70 | 57.27  | 66.70  | 72.42 |
| 1800   | 43.97  | 44.97 | 45.15 | 46.34 | 46.59 | 48.38 | 51.59 | 56.17  | 62.16  | 64.08 |
| 3200   | 45.92  | 44.36 | 44.87 | 44.92 | 46.55 | 48.24 | 51.13 | 54.77  | 60.25  | 63.08 |
| 5600   | 45.64  | 44.99 | 44.80 | 45.18 | 46.41 | 47.99 | 50.56 | 53.46  | 58.25  | 63.54 |
| 10 000 | 44.71  | 45.20 | 44.89 | 45.25 | 46.31 | 48.17 | 50.58 | 53.57  | 58.35  | 62.03 |
| 18 000 | 45.17  | 44.69 | 44.61 | 45.13 | 46.03 | 48.05 | 50.33 | 53.63  | 57.17  | 62.57 |
| 32 000 | 45.47  | 44.78 | 44.64 | 44.95 | 45.94 | 47.85 | 49.83 | 53.04  | 57.81  | 61.88 |
| 56 000 | 45.38  | 44.88 | 44.81 | 45.18 | 45.95 | 47.71 | 49.70 | 52.71  | 57.08  | 61.76 |

**Table SM.2:** Sample Root Mean Squared Error (RMSE) for  $\hat{\beta}_2$  of model (1) obtained by means of Monte Carlo simulations for various values of the number of points ( $N$ ) and the rarity parameter ( $\rho$ ). For each pair ( $N, \rho$ ), the number of replications is equal to 50. All values of the RMSE are multiplied by 100.

| $N$    | $\rho$ |       |       |       |       |       |       |        |        |        |
|--------|--------|-------|-------|-------|-------|-------|-------|--------|--------|--------|
|        | 0.01   | 0.02  | 0.03  | 0.04  | 0.05  | 0.06  | 0.07  | 0.08   | 0.09   | 0.10   |
| 100    | 80.57  | 76.55 | 76.87 | 86.71 | 95.30 | 98.70 | 86.66 | 141.60 | 140.92 | 132.80 |
| 180    | 63.44  | 63.32 | 58.26 | 67.61 | 66.87 | 73.45 | 89.89 | 87.30  | 108.71 | 126.67 |
| 320    | 63.81  | 58.49 | 61.62 | 62.62 | 64.72 | 68.50 | 77.05 | 78.00  | 87.95  | 93.92  |
| 560    | 58.27  | 59.00 | 60.44 | 61.77 | 66.83 | 66.31 | 72.94 | 75.02  | 84.31  | 96.93  |
| 1000   | 60.08  | 59.34 | 60.36 | 60.39 | 63.28 | 66.17 | 69.34 | 75.60  | 86.05  | 95.90  |
| 1800   | 59.55  | 59.36 | 60.35 | 61.69 | 62.59 | 64.71 | 68.63 | 73.41  | 82.87  | 86.54  |
| 3200   | 60.55  | 60.35 | 60.04 | 60.58 | 62.15 | 63.85 | 67.89 | 72.54  | 80.09  | 85.55  |
| 5600   | 60.77  | 60.48 | 60.46 | 60.44 | 61.60 | 64.00 | 66.54 | 70.29  | 77.20  | 83.95  |
| 10 000 | 60.78  | 60.66 | 59.98 | 60.19 | 62.13 | 64.17 | 67.40 | 71.50  | 76.65  | 82.86  |
| 18 000 | 61.09  | 60.22 | 60.11 | 60.63 | 61.52 | 64.18 | 66.82 | 71.44  | 75.72  | 83.31  |
| 32 000 | 61.18  | 60.53 | 60.27 | 60.33 | 61.55 | 63.91 | 66.19 | 70.35  | 76.34  | 82.25  |
| 56 000 | 61.46  | 60.38 | 60.24 | 60.50 | 61.48 | 63.72 | 66.25 | 70.09  | 75.39  | 82.07  |

**Table SM.3:** Sample Root Mean Squared Error (RMSE) for  $\hat{\beta}_3$  of model (1) obtained by means of Monte Carlo simulations for various values of the number of points ( $N$ ) and the rarity parameter ( $\rho$ ). For each pair ( $N, \rho$ ), the number of replications is equal to 50. All values of the RMSE are multiplied by 100.

| $N$    | $\rho$ |        |       |        |        |        |        |        |        |        |
|--------|--------|--------|-------|--------|--------|--------|--------|--------|--------|--------|
|        | 0.01   | 0.02   | 0.03  | 0.04   | 0.05   | 0.06   | 0.07   | 0.08   | 0.09   | 0.10   |
| 100    | 90.49  | 121.48 | 88.54 | 103.11 | 117.56 | 117.07 | 117.33 | 183.02 | 191.32 | 174.68 |
| 180    | 71.31  | 79.03  | 70.44 | 84.57  | 86.78  | 103.49 | 107.34 | 112.85 | 134.61 | 157.21 |
| 320    | 79.29  | 71.14  | 76.65 | 76.76  | 77.77  | 82.97  | 92.09  | 95.93  | 115.09 | 123.38 |
| 560    | 72.51  | 72.45  | 73.64 | 79.66  | 78.54  | 85.67  | 89.83  | 95.37  | 102.99 | 122.73 |
| 1000   | 75.86  | 72.12  | 73.10 | 73.31  | 79.26  | 84.73  | 88.04  | 95.94  | 108.78 | 119.13 |
| 1800   | 72.57  | 73.39  | 72.62 | 75.79  | 76.52  | 80.53  | 83.01  | 92.64  | 102.37 | 105.58 |
| 3200   | 75.40  | 72.41  | 73.29 | 74.15  | 76.38  | 78.30  | 83.63  | 90.87  | 97.92  | 105.70 |
| 5600   | 74.14  | 74.52  | 73.69 | 73.69  | 75.43  | 78.38  | 82.68  | 87.80  | 97.80  | 106.70 |
| 10 000 | 74.51  | 74.02  | 73.22 | 73.89  | 76.23  | 78.70  | 83.10  | 87.83  | 95.82  | 102.48 |
| 18 000 | 76.00  | 73.41  | 73.39 | 73.87  | 75.56  | 78.27  | 82.20  | 88.05  | 93.48  | 103.25 |
| 32 000 | 75.52  | 73.64  | 73.52 | 73.90  | 75.29  | 78.20  | 81.56  | 87.18  | 94.76  | 102.55 |
| 56 000 | 75.36  | 73.78  | 73.43 | 73.91  | 75.26  | 77.99  | 81.51  | 86.49  | 93.90  | 102.20 |

**Table SM.4:** Sample Root Mean Squared Error (RMSE) for  $\hat{\beta}_4$  of model (1) obtained by means of Monte Carlo simulations for various values of the number of points ( $N$ ) and the rarity parameter ( $\rho$ ). For each pair ( $N$ ,  $\rho$ ), the number of replications is equal to 50. All values of the RMSE are multiplied by 100.

| $N$    | $\rho$ |       |       |       |       |       |      |       |       |      |
|--------|--------|-------|-------|-------|-------|-------|------|-------|-------|------|
|        | 0.01   | 0.02  | 0.03  | 0.04  | 0.05  | 0.06  | 0.07 | 0.08  | 0.09  | 0.10 |
| 100    | 11.59  | 14.73 | 11.74 | 8.50  | 11.34 | 8.80  | 9.94 | 10.06 | 10.17 | 8.12 |
| 180    | 12.83  | 14.92 | 11.76 | 11.73 | 9.96  | 9.44  | 9.65 | 8.15  | 8.90  | 8.92 |
| 320    | 13.28  | 13.13 | 12.8  | 12.32 | 10.16 | 11.22 | 9.09 | 8.75  | 8.56  | 8.10 |
| 560    | 16.70  | 14.15 | 13.33 | 11.88 | 10.92 | 10.01 | 9.49 | 8.86  | 8.19  | 9.01 |
| 1000   | 17.12  | 14.51 | 13.34 | 11.45 | 10.77 | 10.77 | 9.46 | 9.25  | 9.03  | 8.65 |
| 1800   | 17.37  | 15.16 | 13.22 | 12.26 | 10.74 | 10.27 | 9.69 | 8.92  | 8.65  | 8.18 |
| 3200   | 17.80  | 14.92 | 13.32 | 12.01 | 11.15 | 10.34 | 9.47 | 9.26  | 8.78  | 8.45 |
| 5600   | 17.42  | 14.91 | 13.48 | 12.16 | 11.06 | 10.24 | 9.73 | 9.12  | 8.46  | 8.38 |
| 10 000 | 17.75  | 14.91 | 13.38 | 12.13 | 11.14 | 10.18 | 9.61 | 8.95  | 8.53  | 8.27 |
| 18 000 | 17.55  | 14.91 | 13.37 | 12.13 | 10.96 | 10.27 | 9.51 | 9.02  | 8.56  | 8.24 |
| 32 000 | 17.54  | 15.11 | 13.34 | 12.06 | 11.08 | 10.25 | 9.59 | 9.05  | 8.59  | 8.18 |
| 56 000 | 17.42  | 14.97 | 13.39 | 12.07 | 11.05 | 10.24 | 9.55 | 9.01  | 8.56  | 8.19 |

**Table SM.5:** Sample Root Mean Squared Error (RMSE) for  $\hat{\sigma}$  of model (1) obtained by means of Monte Carlo simulations for various values of the number of points ( $N$ ) and the rarity parameter ( $\rho$ ). For each pair ( $N$ ,  $\rho$ ), the number of replications is equal to 50. All values of the RMSE are multiplied by 100.

| $N$    | $\rho$ |       |       |       |       |       |        |        |        |        |
|--------|--------|-------|-------|-------|-------|-------|--------|--------|--------|--------|
|        | 0.01   | 0.02  | 0.03  | 0.04  | 0.05  | 0.06  | 0.07   | 0.08   | 0.09   | 0.10   |
| 100    | 0.05   | 0.04  | 0.04  | 0.05  | 0.05  | 0.06  | 0.06   | 0.07   | 0.07   | 0.09   |
| 180    | 0.08   | 0.08  | 0.07  | 0.09  | 0.08  | 0.09  | 0.09   | 0.10   | 0.13   | 0.17   |
| 320    | 0.15   | 0.13  | 0.12  | 0.15  | 0.15  | 0.15  | 0.17   | 0.18   | 0.20   | 0.28   |
| 560    | 0.28   | 0.25  | 0.23  | 0.27  | 0.28  | 0.25  | 0.28   | 0.33   | 0.49   | 0.54   |
| 1000   | 0.49   | 0.51  | 0.39  | 0.49  | 0.45  | 0.51  | 0.51   | 0.80   | 0.91   | 1.52   |
| 1800   | 0.93   | 0.89  | 0.80  | 0.97  | 1.02  | 0.92  | 1.31   | 1.70   | 2.29   | 2.71   |
| 3200   | 1.78   | 1.56  | 1.57  | 1.77  | 1.95  | 1.84  | 2.37   | 3.85   | 4.57   | 8.11   |
| 5600   | 3.10   | 2.98  | 3.17  | 3.36  | 3.73  | 3.29  | 4.57   | 6.33   | 8.84   | 15.20  |
| 10 000 | 7.37   | 5.80  | 6.45  | 7.22  | 7.41  | 7.18  | 11.56  | 15.01  | 23.15  | 27.02  |
| 18 000 | 13.90  | 11.57 | 12.06 | 12.60 | 13.78 | 14.58 | 25.71  | 32.73  | 45.27  | 57.71  |
| 32 000 | 26.27  | 23.69 | 24.93 | 25.54 | 27.72 | 28.12 | 52.18  | 68.06  | 84.42  | 100.77 |
| 56 000 | 56.43  | 46.61 | 47.47 | 61.65 | 60.47 | 68.46 | 102.44 | 136.53 | 151.21 | 179.59 |

**Table SM.6:** Computing times of model (1) obtained by means of Monte Carlo simulations for various values of the number of points ( $N$ ) and the rarity parameter ( $\rho$ ). For each pair ( $N$ ,  $\rho$ ), the number of replications is equal to 50. The table reports the average computing times for one model, expressed in minutes.

| $N$    | $\rho$ |      |       |      |      |       |       |       |       |       |
|--------|--------|------|-------|------|------|-------|-------|-------|-------|-------|
|        | 0.01   | 0.02 | 0.03  | 0.04 | 0.05 | 0.06  | 0.07  | 0.08  | 0.09  | 0.10  |
| 560    | 9.16   | 9.46 | 10.14 | 9.47 | 9.98 | 10.16 | 9.98  | 10.35 | 11.55 | 13.37 |
| 1000   | 9.72   | 9.45 | 9.55  | 9.43 | 9.82 | 9.98  | 10.78 | 10.75 | 11.37 | 13.13 |
| 1800   | 9.49   | 9.32 | 9.49  | 9.58 | 9.60 | 9.90  | 10.19 | 10.47 | 11.07 | 12.49 |
| 3200   | 9.38   | 9.38 | 9.45  | 9.48 | 9.61 | 9.83  | 10.26 | 10.39 | 10.99 | 12.62 |
| 5600   | 9.52   | 9.40 | 9.43  | 9.46 | 9.56 | 9.79  | 10.08 | 10.56 | 11.12 | 12.53 |
| 10 000 | 9.54   | 9.43 | 9.42  | 9.40 | 9.53 | 9.76  | 9.98  | 10.37 | 11.25 | 12.54 |

**Table SM.7:** Sample Root Mean Squared Error (RMSE) for  $\hat{\beta}_1$  of model (3) obtained by means of Monte Carlo simulations for various values of the number of points ( $N$ ) and the rarity parameter ( $\rho$ ). For each pair ( $N, \rho$ ), the number of replications is equal to 50. All values of the RMSE are multiplied by 100.

| $N$    | $\rho$ |      |      |      |      |      |      |      |      |      |
|--------|--------|------|------|------|------|------|------|------|------|------|
|        | 0.01   | 0.02 | 0.03 | 0.04 | 0.05 | 0.06 | 0.07 | 0.08 | 0.09 | 0.10 |
| 560    | 7.52   | 7.48 | 7.04 | 7.18 | 7.16 | 6.81 | 7.18 | 7.14 | 7.04 | 8.16 |
| 1000   | 7.31   | 7.03 | 6.99 | 7.13 | 7.07 | 7.22 | 7.24 | 7.31 | 7.51 | 7.47 |
| 1800   | 6.90   | 7.07 | 7.02 | 7.05 | 7.04 | 7.29 | 7.04 | 7.26 | 7.24 | 7.44 |
| 3200   | 7.15   | 7.16 | 7.04 | 7.12 | 7.10 | 7.31 | 7.22 | 7.21 | 7.14 | 7.11 |
| 5600   | 6.94   | 6.95 | 6.90 | 7.03 | 7.09 | 7.08 | 7.19 | 7.12 | 7.17 | 7.27 |
| 10 000 | 7.07   | 7.06 | 6.95 | 7.03 | 7.02 | 7.11 | 7.16 | 7.05 | 7.20 | 7.30 |

**Table SM.8:** Sample Root Mean Squared Error (RMSE) for  $\hat{\beta}_2$  of model (3) obtained by means of Monte Carlo simulations for various values of the number of points ( $N$ ) and the rarity parameter ( $\rho$ ). For each pair ( $N, \rho$ ), the number of replications is equal to 50. All values of the RMSE are multiplied by 100.

| $N$    | $\rho$ |      |      |      |      |      |      |      |      |      |
|--------|--------|------|------|------|------|------|------|------|------|------|
|        | 0.01   | 0.02 | 0.03 | 0.04 | 0.05 | 0.06 | 0.07 | 0.08 | 0.09 | 0.10 |
| 560    | 9.23   | 9.51 | 8.86 | 9.13 | 9.29 | 9.43 | 9.86 | 9.63 | 9.76 | 9.84 |
| 1000   | 9.04   | 9.16 | 9.06 | 9.44 | 9.23 | 9.33 | 9.50 | 9.40 | 9.69 | 9.34 |
| 1800   | 9.02   | 8.83 | 9.20 | 9.04 | 9.23 | 9.59 | 9.44 | 9.46 | 9.67 | 9.71 |
| 3200   | 9.13   | 9.06 | 8.93 | 9.27 | 9.23 | 9.33 | 9.22 | 9.32 | 9.34 | 9.72 |
| 5600   | 9.19   | 8.96 | 9.08 | 9.15 | 9.14 | 9.33 | 9.43 | 9.48 | 9.37 | 9.62 |
| 10 000 | 8.89   | 8.90 | 9.06 | 9.11 | 9.13 | 9.31 | 9.34 | 9.47 | 9.57 | 9.82 |

**Table SM.9:** Sample Root Mean Squared Error (RMSE) for  $\hat{\beta}_3$  of model (3) obtained by means of Monte Carlo simulations for various values of the number of points ( $N$ ) and the rarity parameter ( $\rho$ ). For each pair ( $N, \rho$ ), the number of replications is equal to 50. All values of the RMSE are multiplied by 100.

| $N$    | $\rho$ |      |      |      |      |      |      |      |       |       |
|--------|--------|------|------|------|------|------|------|------|-------|-------|
|        | 0.01   | 0.02 | 0.03 | 0.04 | 0.05 | 0.06 | 0.07 | 0.08 | 0.09  | 0.10  |
| 560    | 9.22   | 8.82 | 8.75 | 8.94 | 9.15 | 9.05 | 9.18 | 9.06 | 10.07 | 9.97  |
| 1000   | 8.77   | 9.05 | 8.71 | 8.78 | 9.10 | 9.08 | 9.43 | 9.40 | 9.50  | 10.32 |
| 1800   | 8.74   | 8.66 | 8.81 | 8.74 | 8.97 | 9.11 | 9.08 | 9.28 | 9.53  | 9.72  |
| 3200   | 8.81   | 8.71 | 8.58 | 8.68 | 8.89 | 8.95 | 9.02 | 9.24 | 9.34  | 9.82  |
| 5600   | 8.61   | 8.69 | 8.79 | 8.81 | 8.96 | 9.07 | 8.99 | 9.33 | 9.53  | 9.71  |
| 10 000 | 8.80   | 8.79 | 8.69 | 8.75 | 8.91 | 9.06 | 9.01 | 9.15 | 9.52  | 9.84  |

**Table SM.10:** Sample Root Mean Squared Error (RMSE) for  $\hat{\beta}_4$  of model (3) obtained by means of Monte Carlo simulations for various values of the number of points ( $N$ ) and the rarity parameter ( $\rho$ ). For each pair ( $N, \rho$ ), the number of replications is equal to 50. All values of the RMSE are multiplied by 100.

| $N$    | $\rho$ |      |      |      |      |      |      |      |      |      |
|--------|--------|------|------|------|------|------|------|------|------|------|
|        | 0.01   | 0.02 | 0.03 | 0.04 | 0.05 | 0.06 | 0.07 | 0.08 | 0.09 | 0.10 |
| 560    | 3.96   | 4.00 | 4.27 | 5.48 | 7.46 | 8.42 | 8.52 | 8.44 | 8.31 | 8.14 |
| 1000   | 3.29   | 3.87 | 4.32 | 5.07 | 7.64 | 8.77 | 8.65 | 8.49 | 8.40 | 8.20 |
| 1800   | 3.29   | 3.87 | 4.23 | 4.83 | 7.97 | 8.79 | 8.64 | 8.52 | 8.35 | 8.19 |
| 3200   | 3.28   | 3.86 | 4.21 | 4.54 | 7.69 | 8.75 | 8.60 | 8.52 | 8.38 | 8.19 |
| 5600   | 3.28   | 3.84 | 4.19 | 4.52 | 7.73 | 8.81 | 8.66 | 8.55 | 8.39 | 8.24 |
| 10 000 | 3.25   | 3.78 | 4.18 | 4.51 | 7.91 | 8.76 | 8.69 | 8.51 | 8.36 | 8.25 |

**Table SM.11:** Sample Root Mean Squared Error (RMSE) for  $\hat{\sigma}$  of model (3) obtained by means of Monte Carlo simulations for various values of the number of points ( $N$ ) and the rarity parameter ( $\rho$ ). For each pair ( $N$ ,  $\rho$ ), the number of replications is equal to 50. All values of the RMSE are multiplied by 100.

| $N$    | $\rho$ |        |        |        |        |        |        |        |        |        |
|--------|--------|--------|--------|--------|--------|--------|--------|--------|--------|--------|
|        | 0.01   | 0.02   | 0.03   | 0.04   | 0.05   | 0.06   | 0.07   | 0.08   | 0.09   | 0.10   |
| 560    | 10.50  | 10.73  | 10.78  | 10.40  | 8.59   | 6.89   | 6.23   | 6.35   | 6.30   | 6.22   |
| 1000   | 18.37  | 18.89  | 19.54  | 19.06  | 14.58  | 11.81  | 11.52  | 11.42  | 11.34  | 11.47  |
| 1800   | 33.33  | 34.11  | 35.20  | 34.93  | 25.00  | 20.49  | 20.02  | 20.50  | 20.43  | 20.32  |
| 3200   | 58.61  | 60.56  | 62.68  | 63.81  | 45.61  | 36.25  | 36.36  | 36.31  | 36.46  | 36.32  |
| 5600   | 102.70 | 105.50 | 108.88 | 110.84 | 80.55  | 64.35  | 64.04  | 63.56  | 63.58  | 63.35  |
| 10 000 | 182.85 | 191.19 | 194.84 | 199.70 | 137.64 | 114.04 | 114.48 | 113.98 | 114.32 | 114.35 |

**Table SM.12:** Computing times of model (3) obtained by means of Monte Carlo simulations for various values of the number of points ( $N$ ) and the rarity parameter ( $\rho$ ). For each pair ( $N$ ,  $\rho$ ), the number of replications is equal to 50. The table reports the average computing times for one model, expressed in minutes.

| $N$    | $\rho$ |       |       |       |       |       |       |       |       |       |
|--------|--------|-------|-------|-------|-------|-------|-------|-------|-------|-------|
|        | 0.01   | 0.02  | 0.03  | 0.04  | 0.05  | 0.06  | 0.07  | 0.08  | 0.09  | 0.10  |
| 560    | 25.57  | 23.63 | 23.75 | 23.31 | 23.66 | 23.46 | 24.37 | 24.05 | 23.21 | 24.00 |
| 1000   | 25.06  | 25.18 | 24.42 | 24.13 | 23.47 | 23.91 | 23.94 | 23.96 | 24.09 | 23.63 |
| 1800   | 24.69  | 24.75 | 23.85 | 23.27 | 23.43 | 23.69 | 23.76 | 23.18 | 23.74 | 23.56 |
| 3200   | 25.44  | 24.62 | 24.12 | 23.88 | 23.77 | 24.12 | 23.41 | 23.50 | 23.40 | 23.39 |
| 5600   | 24.79  | 24.25 | 24.12 | 24.15 | 23.72 | 23.60 | 23.69 | 23.55 | 23.67 | 23.67 |
| 10 000 | 25.01  | 24.25 | 24.06 | 24.10 | 23.99 | 23.73 | 23.54 | 23.51 | 23.37 | 23.52 |

**Table SM.13:** Sample Root Mean Squared Error (RMSE) for  $\hat{\beta}_1$  of model (1) with  $\Omega = \Xi \otimes I_G$  obtained by means of Monte Carlo simulations for various values of the number of points ( $N$ ) and the rarity parameter ( $\rho$ ). For each pair ( $N$ ,  $\rho$ ), the number of replications is equal to 100. All values of the RMSE are multiplied by 100.

| $N$    | $\rho$ |       |       |       |       |       |       |       |       |       |
|--------|--------|-------|-------|-------|-------|-------|-------|-------|-------|-------|
|        | 0.01   | 0.02  | 0.03  | 0.04  | 0.05  | 0.06  | 0.07  | 0.08  | 0.09  | 0.10  |
| 560    | 26.69  | 26.09 | 26.22 | 26.11 | 25.27 | 24.81 | 25.05 | 25.53 | 25.16 | 25.18 |
| 1000   | 25.33  | 25.46 | 25.38 | 25.26 | 25.38 | 24.87 | 24.88 | 24.60 | 25.60 | 25.36 |
| 1800   | 26.32  | 25.65 | 25.20 | 24.99 | 25.38 | 25.25 | 25.04 | 25.33 | 25.03 | 25.25 |
| 3200   | 25.47  | 25.56 | 24.89 | 25.27 | 25.13 | 24.77 | 24.68 | 24.73 | 24.89 | 25.05 |
| 5600   | 25.49  | 25.34 | 24.94 | 25.17 | 24.88 | 25.06 | 25.10 | 25.21 | 25.19 | 24.88 |
| 10 000 | 25.61  | 25.47 | 25.16 | 25.16 | 24.88 | 25.04 | 24.95 | 25.00 | 24.99 | 25.05 |

**Table SM.14:** Sample Root Mean Squared Error (RMSE) for  $\hat{\beta}_2$  of model (1) with  $\Omega = \Xi \otimes I_G$  obtained by means of Monte Carlo simulations for various values of the number of points ( $N$ ) and the rarity parameter ( $\rho$ ). For each pair ( $N$ ,  $\rho$ ), the number of replications is equal to 100. All values of the RMSE are multiplied by 100.

| $N$    | $\rho$ |       |       |       |       |       |       |       |       |       |
|--------|--------|-------|-------|-------|-------|-------|-------|-------|-------|-------|
|        | 0.01   | 0.02  | 0.03  | 0.04  | 0.05  | 0.06  | 0.07  | 0.08  | 0.09  | 0.10  |
| 560    | 37.38  | 36.45 | 35.97 | 35.29 | 34.61 | 34.42 | 34.78 | 34.16 | 33.45 | 33.71 |
| 1000   | 36.48  | 37.21 | 35.46 | 35.66 | 33.76 | 34.35 | 33.95 | 33.48 | 33.85 | 32.79 |
| 1800   | 37.08  | 37.33 | 36.21 | 35.38 | 34.45 | 34.39 | 34.21 | 34.23 | 33.62 | 33.45 |
| 3200   | 37.81  | 36.50 | 36.41 | 35.62 | 35.46 | 35.36 | 34.31 | 34.18 | 33.50 | 33.49 |
| 5600   | 37.46  | 36.26 | 36.28 | 35.57 | 34.43 | 34.92 | 34.75 | 34.05 | 33.76 | 33.41 |
| 10 000 | 38.14  | 36.55 | 36.00 | 35.90 | 35.04 | 35.14 | 34.42 | 34.26 | 33.66 | 34.01 |

**Table SM.15:** Sample Root Mean Squared Error (RMSE) for  $\hat{\beta}_3$  of model (1) with  $\Omega = \Xi \otimes I_G$  obtained by means of Monte Carlo simulations for various values of the number of points ( $N$ ) and the rarity parameter ( $\rho$ ). For each pair ( $N$ ,  $\rho$ ), the number of replications is equal to 100. All values of the RMSE are multiplied by 100.

| $N$    | $\rho$ |       |       |       |       |       |       |       |       |       |
|--------|--------|-------|-------|-------|-------|-------|-------|-------|-------|-------|
|        | 0.01   | 0.02  | 0.03  | 0.04  | 0.05  | 0.06  | 0.07  | 0.08  | 0.09  | 0.10  |
| 560    | 67.60  | 64.71 | 63.33 | 64.23 | 64.20 | 62.53 | 63.99 | 63.78 | 63.11 | 63.83 |
| 1000   | 66.72  | 65.18 | 64.51 | 65.52 | 63.81 | 64.43 | 63.53 | 62.78 | 63.15 | 63.06 |
| 1800   | 67.07  | 66.12 | 65.37 | 64.60 | 63.87 | 64.15 | 63.65 | 63.58 | 63.64 | 63.06 |
| 3200   | 67.04  | 65.41 | 63.80 | 65.00 | 63.86 | 63.68 | 63.08 | 63.47 | 63.35 | 63.17 |
| 5600   | 66.88  | 65.28 | 65.09 | 64.54 | 63.90 | 63.72 | 63.73 | 63.53 | 63.72 | 63.21 |
| 10 000 | 66.23  | 65.42 | 64.84 | 64.58 | 64.30 | 63.82 | 63.80 | 63.28 | 63.32 | 63.04 |

**Table SM.16:** Sample Root Mean Squared Error (RMSE) for  $\hat{\beta}_4$  of model (1) with  $\Omega = \Xi \otimes I_G$  obtained by means of Monte Carlo simulations for various values of the number of points ( $N$ ) and the rarity parameter ( $\rho$ ). For each pair ( $N$ ,  $\rho$ ), the number of replications is equal to 100. All values of the RMSE are multiplied by 100.

| $N$    | $\rho$ |       |       |       |       |       |       |       |       |       |
|--------|--------|-------|-------|-------|-------|-------|-------|-------|-------|-------|
|        | 0.01   | 0.02  | 0.03  | 0.04  | 0.05  | 0.06  | 0.07  | 0.08  | 0.09  | 0.10  |
| 560    | 12.14  | 11.12 | 12.47 | 12.77 | 11.86 | 11.31 | 12.42 | 9.85  | 10.82 | 11.12 |
| 1000   | 12.25  | 11.67 | 12.07 | 12.22 | 10.22 | 11.37 | 11.14 | 11.58 | 10.78 | 11.30 |
| 1800   | 12.65  | 12.74 | 11.98 | 11.78 | 11.80 | 12.29 | 11.23 | 10.78 | 10.76 | 10.63 |
| 3200   | 13.06  | 12.59 | 11.53 | 12.17 | 11.57 | 11.52 | 11.85 | 10.96 | 11.10 | 10.94 |
| 5600   | 11.75  | 12.08 | 12.20 | 12.01 | 11.50 | 11.79 | 11.60 | 11.15 | 11.23 | 10.87 |
| 10 000 | 12.72  | 12.17 | 12.34 | 12.00 | 11.84 | 11.50 | 11.48 | 11.25 | 11.44 | 10.78 |

**Table SM.17:** Sample Root Mean Squared Error (RMSE) for  $\hat{\sigma}_1$  of model (1) with  $\Omega = \Xi \otimes I_G$  obtained by means of Monte Carlo simulations for various values of the number of points ( $N$ ) and the rarity parameter ( $\rho$ ). For each pair ( $N, \rho$ ), the number of replications is equal to 100. All values of the RMSE are multiplied by 100.

| $N$    | $\rho$ |       |       |       |       |       |       |       |       |       |
|--------|--------|-------|-------|-------|-------|-------|-------|-------|-------|-------|
|        | 0.01   | 0.02  | 0.03  | 0.04  | 0.05  | 0.06  | 0.07  | 0.08  | 0.09  | 0.10  |
| 560    | 17.57  | 17.78 | 18.38 | 18.37 | 17.81 | 18.14 | 18.07 | 17.84 | 17.84 | 17.76 |
| 1000   | 18.36  | 18.63 | 19.12 | 18.51 | 18.70 | 18.26 | 18.46 | 18.54 | 18.02 | 18.16 |
| 1800   | 18.86  | 18.83 | 18.92 | 18.77 | 18.75 | 18.28 | 18.62 | 18.18 | 18.44 | 18.26 |
| 3200   | 18.55  | 18.61 | 18.88 | 18.90 | 18.93 | 18.52 | 18.64 | 18.50 | 18.27 | 18.19 |
| 5600   | 19.07  | 18.92 | 19.10 | 18.96 | 18.81 | 18.66 | 18.63 | 18.48 | 18.40 | 18.46 |
| 10 000 | 19.02  | 19.07 | 19.08 | 18.95 | 18.83 | 18.69 | 18.53 | 18.45 | 18.36 | 18.32 |

**Table SM.18:** Sample Root Mean Squared Error (RMSE) for  $\hat{\sigma}_2$  of model (1) with  $\Omega = \Xi \otimes I_G$  obtained by means of Monte Carlo simulations for various values of the number of points ( $N$ ) and the rarity parameter ( $\rho$ ). For each pair ( $N, \rho$ ), the number of replications is equal to 100. All values of the RMSE are multiplied by 100.

| $N$    | $\rho$ |         |       |       |       |       |       |       |       |       |
|--------|--------|---------|-------|-------|-------|-------|-------|-------|-------|-------|
|        | 0.01   | 0.02    | 0.03  | 0.04  | 0.05  | 0.06  | 0.07  | 0.08  | 0.09  | 0.10  |
| 560    | 42.28  | 4184.69 | 42.57 | 42.55 | 43.30 | 42.75 | 42.63 | 42.73 | 42.79 | 42.95 |
| 1000   | 41.70  | 42.51   | 42.77 | 43.53 | 43.17 | 43.08 | 42.97 | 43.12 | 43.71 | 42.91 |
| 1800   | 40.47  | 42.89   | 43.12 | 44.11 | 43.93 | 43.28 | 43.52 | 43.38 | 43.55 | 43.65 |
| 3200   | 39.81  | 42.56   | 42.86 | 43.64 | 43.71 | 43.89 | 43.45 | 43.82 | 43.76 | 43.69 |
| 5600   | 39.85  | 42.00   | 42.71 | 43.43 | 44.16 | 44.21 | 43.83 | 43.82 | 43.46 | 43.97 |
| 10 000 | 39.71  | 41.91   | 42.97 | 43.68 | 43.96 | 44.03 | 43.81 | 43.68 | 43.68 | 43.54 |

**Table SM.19:** Sample Root Mean Squared Error (RMSE) for  $\hat{\sigma}_3$  of model (1) with  $\Omega = \Xi \otimes I_G$  obtained by means of Monte Carlo simulations for various values of the number of points ( $N$ ) and the rarity parameter ( $\rho$ ). For each pair ( $N, \rho$ ), the number of replications is equal to 100. All values of the RMSE are multiplied by 100.

| $N$    | $\rho$ |       |       |       |       |       |       |       |       |       |
|--------|--------|-------|-------|-------|-------|-------|-------|-------|-------|-------|
|        | 0.01   | 0.02  | 0.03  | 0.04  | 0.05  | 0.06  | 0.07  | 0.08  | 0.09  | 0.10  |
| 560    | 63.30  | 62.63 | 63.13 | 64.48 | 64.01 | 66.00 | 66.58 | 65.03 | 66.65 | 67.22 |
| 1000   | 58.32  | 60.95 | 62.56 | 62.69 | 62.52 | 64.39 | 65.15 | 66.12 | 64.63 | 66.95 |
| 1800   | 59.62  | 60.23 | 62.24 | 62.70 | 62.59 | 64.32 | 63.99 | 65.61 | 64.96 | 65.59 |
| 3200   | 57.43  | 60.57 | 60.90 | 62.53 | 63.14 | 63.64 | 65.06 | 64.51 | 65.80 | 66.41 |
| 5600   | 57.49  | 59.91 | 61.47 | 62.97 | 62.97 | 64.55 | 64.56 | 65.15 | 65.49 | 65.66 |
| 10 000 | 57.28  | 59.51 | 62.37 | 63.04 | 63.30 | 63.85 | 64.56 | 64.85 | 66.06 | 66.11 |

**Table SM.20:** Sample Root Mean Squared Error (RMSE) for  $\hat{\sigma}_4$  of model (1) with  $\Omega = \Xi \otimes I_G$  obtained by means of Monte Carlo simulations for various values of the number of points ( $N$ ) and the rarity parameter ( $\rho$ ). For each pair ( $N, \rho$ ), the number of replications is equal to 100. All values of the RMSE are multiplied by 100.

| $N$    | $\rho$ |      |      |      |       |      |       |       |       |       |
|--------|--------|------|------|------|-------|------|-------|-------|-------|-------|
|        | 0.01   | 0.02 | 0.03 | 0.04 | 0.05  | 0.06 | 0.07  | 0.08  | 0.09  | 0.10  |
| 560    | 0.03   | 0.01 | 0.01 | 0.01 | -0.01 | 0.00 | -0.01 | -0.01 | -0.01 | -0.02 |
| 1000   | 0.04   | 0.02 | 0.02 | 0.01 | 0.00  | 0.00 | -0.01 | -0.01 | -0.01 | -0.01 |
| 1800   | 0.04   | 0.03 | 0.01 | 0.01 | 0.00  | 0.00 | 0.00  | -0.01 | -0.01 | -0.01 |
| 3200   | 0.03   | 0.02 | 0.02 | 0.01 | 0.01  | 0.00 | 0.00  | -0.01 | -0.01 | -0.01 |
| 5600   | 0.03   | 0.03 | 0.02 | 0.01 | 0.01  | 0.00 | 0.00  | 0.00  | -0.01 | -0.01 |
| 10 000 | 0.04   | 0.02 | 0.02 | 0.01 | 0.01  | 0.00 | 0.00  | -0.01 | -0.01 | -0.01 |

**Table SM.21:** Sample bias for  $\hat{\beta}_1$  of model (1) with  $\Omega = \Xi \otimes I_G$  obtained by means of Monte Carlo simulations for various values of the number of points ( $N$ ) and the rarity parameter ( $\rho$ ). For each pair  $(N, \rho)$ , the number of replications is equal to 100. All values of the RMSE are multiplied by 100.

| $N$    | $\rho$ |      |      |       |       |       |       |       |       |       |
|--------|--------|------|------|-------|-------|-------|-------|-------|-------|-------|
|        | 0.01   | 0.02 | 0.03 | 0.04  | 0.05  | 0.06  | 0.07  | 0.08  | 0.09  | 0.10  |
| 560    | 0.02   | 0.00 | 0.00 | 0.00  | -0.01 | -0.02 | -0.02 | -0.03 | -0.03 | -0.03 |
| 1000   | 0.02   | 0.01 | 0.00 | -0.01 | -0.02 | -0.01 | -0.02 | -0.02 | -0.03 | -0.03 |
| 1800   | 0.02   | 0.01 | 0.00 | -0.01 | -0.01 | -0.02 | -0.02 | -0.03 | -0.03 | -0.03 |
| 3200   | 0.02   | 0.01 | 0.00 | 0.00  | -0.01 | -0.02 | -0.02 | -0.02 | -0.03 | -0.03 |
| 5600   | 0.02   | 0.01 | 0.00 | 0.00  | -0.01 | -0.01 | -0.02 | -0.02 | -0.03 | -0.03 |
| 10 000 | 0.02   | 0.01 | 0.00 | 0.00  | -0.01 | -0.01 | -0.02 | -0.02 | -0.02 | -0.03 |

**Table SM.22:** Sample bias for  $\hat{\beta}_2$  of model (1) with  $\Omega = \Xi \otimes I_G$  obtained by means of Monte Carlo simulations for various values of the number of points ( $N$ ) and the rarity parameter ( $\rho$ ). For each pair  $(N, \rho)$ , the number of replications is equal to 100. All values of the RMSE are multiplied by 100.

| $N$    | $\rho$ |      |      |      |      |      |      |      |      |      |
|--------|--------|------|------|------|------|------|------|------|------|------|
|        | 0.01   | 0.02 | 0.03 | 0.04 | 0.05 | 0.06 | 0.07 | 0.08 | 0.09 | 0.10 |
| 560    | 0.09   | 0.08 | 0.08 | 0.08 | 0.07 | 0.06 | 0.06 | 0.05 | 0.05 | 0.04 |
| 1000   | 0.10   | 0.09 | 0.08 | 0.07 | 0.06 | 0.07 | 0.06 | 0.05 | 0.05 | 0.04 |
| 1800   | 0.10   | 0.09 | 0.08 | 0.07 | 0.07 | 0.06 | 0.06 | 0.05 | 0.05 | 0.05 |
| 3200   | 0.10   | 0.09 | 0.08 | 0.08 | 0.07 | 0.07 | 0.06 | 0.05 | 0.05 | 0.05 |
| 5600   | 0.11   | 0.09 | 0.08 | 0.08 | 0.07 | 0.07 | 0.06 | 0.05 | 0.05 | 0.05 |
| 10 000 | 0.11   | 0.10 | 0.08 | 0.08 | 0.07 | 0.07 | 0.06 | 0.06 | 0.05 | 0.05 |

**Table SM.23:** Sample bias for  $\hat{\beta}_3$  of model (1) with  $\Omega = \Xi \otimes I_G$  obtained by means of Monte Carlo simulations for various values of the number of points ( $N$ ) and the rarity parameter ( $\rho$ ). For each pair  $(N, \rho)$ , the number of replications is equal to 100. All values of the RMSE are multiplied by 100.

| $N$    | $\rho$ |       |       |       |       |       |       |       |       |       |
|--------|--------|-------|-------|-------|-------|-------|-------|-------|-------|-------|
|        | 0.01   | 0.02  | 0.03  | 0.04  | 0.05  | 0.06  | 0.07  | 0.08  | 0.09  | 0.10  |
| 560    | 0.01   | -0.01 | -0.02 | -0.01 | -0.02 | -0.03 | -0.02 | -0.03 | -0.03 | -0.04 |
| 1000   | 0.01   | 0.02  | 0.00  | -0.01 | -0.01 | -0.02 | -0.03 | -0.03 | -0.04 | -0.04 |
| 1800   | 0.03   | 0.01  | 0.00  | 0.00  | -0.01 | -0.02 | -0.02 | -0.03 | -0.03 | -0.04 |
| 3200   | 0.03   | 0.01  | 0.01  | 0.00  | -0.01 | -0.02 | -0.02 | -0.03 | -0.03 | -0.04 |
| 5600   | 0.02   | 0.01  | 0.01  | 0.00  | -0.01 | -0.01 | -0.02 | -0.02 | -0.03 | -0.03 |
| 10 000 | 0.04   | 0.02  | 0.01  | 0.00  | 0.00  | -0.01 | -0.02 | -0.02 | -0.03 | -0.03 |

**Table SM.24:** Sample bias for  $\hat{\beta}_4$  of model (1) with  $\Omega = \Xi \otimes I_G$  obtained by means of Monte Carlo simulations for various values of the number of points ( $N$ ) and the rarity parameter ( $\rho$ ). For each pair  $(N, \rho)$ , the number of replications is equal to 100. All values of the RMSE are multiplied by 100.



| $N$    | $\rho$ |       |       |       |       |       |       |       |       |       |
|--------|--------|-------|-------|-------|-------|-------|-------|-------|-------|-------|
|        | 0.01   | 0.02  | 0.03  | 0.04  | 0.05  | 0.06  | 0.07  | 0.08  | 0.09  | 0.10  |
| 560    | -0.04  | -0.06 | -0.05 | -0.05 | -0.05 | -0.06 | -0.05 | -0.07 | -0.06 | -0.06 |
| 1000   | -0.04  | -0.05 | -0.05 | -0.06 | -0.07 | -0.06 | -0.06 | -0.06 | -0.06 | -0.06 |
| 1800   | -0.04  | -0.05 | -0.06 | -0.06 | -0.06 | -0.06 | -0.06 | -0.07 | -0.07 | -0.07 |
| 3200   | -0.04  | -0.05 | -0.06 | -0.06 | -0.06 | -0.06 | -0.06 | -0.07 | -0.06 | -0.06 |
| 5600   | -0.05  | -0.06 | -0.06 | -0.06 | -0.07 | -0.06 | -0.06 | -0.07 | -0.06 | -0.06 |
| 10 000 | -0.05  | -0.06 | -0.06 | -0.06 | -0.06 | -0.07 | -0.06 | -0.07 | -0.06 | -0.07 |

**Table SM.25:** Sample bias for  $\hat{\sigma}_1$  of model (1) with  $\Omega = \Xi \otimes I_G$  obtained by means of Monte Carlo simulations for various values of the number of points ( $N$ ) and the rarity parameter ( $\rho$ ). For each pair ( $N, \rho$ ), the number of replications is equal to 100. All values of the RMSE are multiplied by 100.

| $N$    | $\rho$ |       |       |       |       |       |       |       |       |       |
|--------|--------|-------|-------|-------|-------|-------|-------|-------|-------|-------|
|        | 0.01   | 0.02  | 0.03  | 0.04  | 0.05  | 0.06  | 0.07  | 0.08  | 0.09  | 0.10  |
| 560    | -0.12  | -0.14 | -0.13 | -0.16 | -0.15 | -0.15 | -0.15 | -0.15 | -0.15 | -0.16 |
| 1000   | -0.13  | -0.14 | -0.15 | -0.15 | -0.15 | -0.16 | -0.15 | -0.15 | -0.15 | -0.16 |
| 1800   | -0.13  | -0.14 | -0.15 | -0.15 | -0.16 | -0.16 | -0.16 | -0.16 | -0.16 | -0.16 |
| 3200   | -0.14  | -0.15 | -0.15 | -0.15 | -0.15 | -0.16 | -0.16 | -0.16 | -0.16 | -0.16 |
| 5600   | -0.14  | -0.15 | -0.15 | -0.16 | -0.16 | -0.16 | -0.16 | -0.16 | -0.16 | -0.16 |
| 10 000 | -0.14  | -0.15 | -0.15 | -0.15 | -0.15 | -0.16 | -0.16 | -0.16 | -0.16 | -0.16 |

**Table SM.26:** Sample bias for  $\hat{\sigma}_2$  of model (1) with  $\Omega = \Xi \otimes I_G$  obtained by means of Monte Carlo simulations for various values of the number of points ( $N$ ) and the rarity parameter ( $\rho$ ). For each pair ( $N, \rho$ ), the number of replications is equal to 100. All values of the RMSE are multiplied by 100.

| $N$    | $\rho$ |       |       |       |       |       |       |       |       |       |
|--------|--------|-------|-------|-------|-------|-------|-------|-------|-------|-------|
|        | 0.01   | 0.02  | 0.03  | 0.04  | 0.05  | 0.06  | 0.07  | 0.08  | 0.09  | 0.10  |
| 560    | -0.30  | 3.89  | -0.33 | -0.33 | -0.34 | -0.34 | -0.35 | -0.35 | -0.36 | -0.37 |
| 1000   | -0.27  | -0.31 | -0.32 | -0.35 | -0.35 | -0.35 | -0.36 | -0.36 | -0.38 | -0.36 |
| 1800   | -0.27  | -0.32 | -0.32 | -0.35 | -0.35 | -0.35 | -0.36 | -0.35 | -0.37 | -0.37 |
| 3200   | -0.26  | -0.30 | -0.32 | -0.34 | -0.35 | -0.36 | -0.36 | -0.36 | -0.37 | -0.37 |
| 5600   | -0.26  | -0.30 | -0.32 | -0.34 | -0.35 | -0.35 | -0.36 | -0.36 | -0.37 | -0.38 |
| 10 000 | -0.26  | -0.30 | -0.33 | -0.34 | -0.35 | -0.35 | -0.36 | -0.36 | -0.37 | -0.37 |

**Table SM.27:** Sample bias for  $\hat{\sigma}_3$  of model (1) with  $\Omega = \Xi \otimes I_G$  obtained by means of Monte Carlo simulations for various values of the number of points ( $N$ ) and the rarity parameter ( $\rho$ ). For each pair ( $N, \rho$ ), the number of replications is equal to 100. All values of the RMSE are multiplied by 100.

| $N$    | $\rho$ |       |       |       |       |       |       |       |       |       |
|--------|--------|-------|-------|-------|-------|-------|-------|-------|-------|-------|
|        | 0.01   | 0.02  | 0.03  | 0.04  | 0.05  | 0.06  | 0.07  | 0.08  | 0.09  | 0.10  |
| 560    | -0.37  | -0.43 | -0.45 | -0.50 | -0.49 | -0.51 | -0.53 | -0.53 | -0.55 | -0.57 |
| 1000   | -0.38  | -0.43 | -0.44 | -0.47 | -0.47 | -0.50 | -0.52 | -0.54 | -0.54 | -0.56 |
| 1800   | -0.37  | -0.41 | -0.45 | -0.47 | -0.48 | -0.50 | -0.51 | -0.53 | -0.54 | -0.55 |
| 3200   | -0.38  | -0.42 | -0.44 | -0.46 | -0.48 | -0.50 | -0.52 | -0.52 | -0.54 | -0.56 |
| 5600   | -0.37  | -0.41 | -0.44 | -0.47 | -0.48 | -0.50 | -0.52 | -0.53 | -0.54 | -0.55 |
| 10 000 | -0.38  | -0.41 | -0.45 | -0.47 | -0.48 | -0.49 | -0.51 | -0.52 | -0.54 | -0.55 |

**Table SM.28:** Sample bias for  $\hat{\sigma}_4$  of model (1) with  $\Omega = \Xi \otimes I_G$  obtained by means of Monte Carlo simulations for various values of the number of points ( $N$ ) and the rarity parameter ( $\rho$ ). For each pair ( $N, \rho$ ), the number of replications is equal to 100. All values of the RMSE are multiplied by 100.

| $N$    | $\rho$ |       |       |       |       |       |       |       |       |       |
|--------|--------|-------|-------|-------|-------|-------|-------|-------|-------|-------|
|        | 0.01   | 0.02  | 0.03  | 0.04  | 0.05  | 0.06  | 0.07  | 0.08  | 0.09  | 0.10  |
| 560    | 0.68   | 0.68  | 0.69  | 0.78  | 0.74  | 0.78  | 0.84  | 0.83  | 0.85  | 0.89  |
| 1000   | 1.30   | 1.36  | 1.55  | 1.57  | 1.58  | 1.70  | 1.61  | 1.74  | 1.75  | 1.75  |
| 1800   | 2.44   | 2.70  | 2.91  | 3.37  | 3.32  | 3.43  | 3.63  | 3.59  | 3.49  | 3.82  |
| 3200   | 4.43   | 5.11  | 5.91  | 6.52  | 6.99  | 7.03  | 7.31  | 7.40  | 7.37  | 7.25  |
| 5600   | 9.11   | 10.81 | 12.84 | 13.59 | 13.47 | 13.27 | 15.00 | 14.33 | 14.45 | 14.34 |
| 10 000 | 18.52  | 22.93 | 25.16 | 27.15 | 27.59 | 29.11 | 31.65 | 32.84 | 30.58 | 29.81 |

**Table SM.29:** Computing times of model (1) with  $\Omega = \Xi \otimes I_G$  obtained by means of Monte Carlo simulations for various values of the number of points ( $N$ ) and the rarity parameter ( $\rho$ ). For each pair  $(N, \rho)$ , the number of replications is equal to 100. The table reports the average computing times for one model, expressed in minutes.

| $q$ | $\beta$ |       |       |       |       |       |       |       |       |       |
|-----|---------|-------|-------|-------|-------|-------|-------|-------|-------|-------|
|     | 0.90    | 0.91  | 0.92  | 0.93  | 0.94  | 0.95  | 0.96  | 0.97  | 0.98  | 0.99  |
| 5   | 33.30   | 33.56 | 33.90 | 34.11 | 33.85 | 34.14 | 34.30 | 34.46 | 34.76 | 35.06 |
| 6   | 32.59   | 32.65 | 32.86 | 33.28 | 33.09 | 33.48 | 33.46 | 33.49 | 33.55 | 33.91 |
| 7   | 32.05   | 32.34 | 32.47 | 32.66 | 32.96 | 32.57 | 33.08 | 32.75 | 32.62 | 32.95 |
| 8   | 32.29   | 32.13 | 31.92 | 31.85 | 32.10 | 32.55 | 32.18 | 32.08 | 32.57 | 32.67 |
| 9   | 31.64   | 31.84 | 31.91 | 31.76 | 31.91 | 32.01 | 32.04 | 32.35 | 32.05 | 32.10 |
| 10  | 31.81   | 31.64 | 31.55 | 31.86 | 31.92 | 31.88 | 31.90 | 32.06 | 32.05 | 31.78 |

**Table SM.30:** Sample Root Mean Squared Error (RMSE) for  $\hat{\beta}_1$  of model (1) obtained by means of Monte Carlo simulations for various values of the smoothing parameters  $q$  and  $\beta$  of Equation (15). For each pair  $(q, \beta)$ , the number of replications is equal to 250. All values of the RMSE are multiplied by 100.

| $q$ | $\beta$ |       |       |       |       |       |       |       |       |       |
|-----|---------|-------|-------|-------|-------|-------|-------|-------|-------|-------|
|     | 0.90    | 0.91  | 0.92  | 0.93  | 0.94  | 0.95  | 0.96  | 0.97  | 0.98  | 0.99  |
| 5   | 52.67   | 53.31 | 53.62 | 54.03 | 54.25 | 54.74 | 55.46 | 55.65 | 56.07 | 56.79 |
| 6   | 50.36   | 50.62 | 51.08 | 51.80 | 51.91 | 52.59 | 52.15 | 52.51 | 53.33 | 53.17 |
| 7   | 48.81   | 49.70 | 50.29 | 50.54 | 50.74 | 50.51 | 50.74 | 50.74 | 50.90 | 50.89 |
| 8   | 48.75   | 48.49 | 48.63 | 48.78 | 48.87 | 49.27 | 49.11 | 49.13 | 50.20 | 50.45 |
| 9   | 47.23   | 47.76 | 48.16 | 48.16 | 48.25 | 48.34 | 48.09 | 48.87 | 49.19 | 48.89 |
| 10  | 47.16   | 47.16 | 47.27 | 47.66 | 47.58 | 47.61 | 48.04 | 48.16 | 47.95 | 48.08 |

**Table SM.31:** Sample Root Mean Squared Error (RMSE) for  $\hat{\beta}_2$  of model (1) obtained by means of Monte Carlo simulations for various values of the smoothing parameters  $q$  and  $\beta$  of Equation (15). For each pair  $(q, \beta)$ , the number of replications is equal to 250. All values of the RMSE are multiplied by 100.

| $q$ | $\beta$ |       |       |       |       |       |       |       |       |       |
|-----|---------|-------|-------|-------|-------|-------|-------|-------|-------|-------|
|     | 0.90    | 0.91  | 0.92  | 0.93  | 0.94  | 0.95  | 0.96  | 0.97  | 0.98  | 0.99  |
| 5   | 69.46   | 70.90 | 71.62 | 71.88 | 72.28 | 73.19 | 73.42 | 73.86 | 74.67 | 75.43 |
| 6   | 67.10   | 67.30 | 67.57 | 68.09 | 68.78 | 69.84 | 69.43 | 69.86 | 71.37 | 70.40 |
| 7   | 65.55   | 66.10 | 66.62 | 67.06 | 67.36 | 67.02 | 67.85 | 67.48 | 67.83 | 67.70 |
| 8   | 64.57   | 64.58 | 64.89 | 65.00 | 65.57 | 65.55 | 65.27 | 65.13 | 66.30 | 66.97 |
| 9   | 62.92   | 64.09 | 64.13 | 64.10 | 64.18 | 64.07 | 63.95 | 64.83 | 65.26 | 64.52 |
| 10  | 62.81   | 63.09 | 62.71 | 63.00 | 63.57 | 63.16 | 64.15 | 63.79 | 63.81 | 64.31 |

**Table SM.32:** Sample Root Mean Squared Error (RMSE) for  $\hat{\beta}_3$  of model (1) obtained by means of Monte Carlo simulations for various values of the smoothing parameters  $q$  and  $\beta$  of Equation (15). For each pair  $(q, \beta)$ , the number of replications is equal to 250. All values of the RMSE are multiplied by 100.

| $q$ | $\beta$ |       |       |       |       |       |       |       |        |        |
|-----|---------|-------|-------|-------|-------|-------|-------|-------|--------|--------|
|     | 0.90    | 0.91  | 0.92  | 0.93  | 0.94  | 0.95  | 0.96  | 0.97  | 0.98   | 0.99   |
| 5   | 92.02   | 94.05 | 94.18 | 95.28 | 95.89 | 96.67 | 97.24 | 98.14 | 100.30 | 101.00 |
| 6   | 88.36   | 89.00 | 89.67 | 90.62 | 90.78 | 92.51 | 92.34 | 92.65 | 94.23  | 93.50  |
| 7   | 86.30   | 87.30 | 87.87 | 88.97 | 89.41 | 88.90 | 90.24 | 89.26 | 89.22  | 89.79  |
| 8   | 85.69   | 84.93 | 85.07 | 85.58 | 86.28 | 86.75 | 86.15 | 85.96 | 87.41  | 88.56  |
| 9   | 82.89   | 83.93 | 84.37 | 84.35 | 84.39 | 84.45 | 84.95 | 85.40 | 86.23  | 85.45  |
| 10  | 83.04   | 82.79 | 83.00 | 83.24 | 83.67 | 82.90 | 84.50 | 84.04 | 84.14  | 84.67  |

**Table SM.33:** Sample Root Mean Squared Error (RMSE) for  $\hat{\beta}_4$  of model (1) obtained by means of Monte Carlo simulations for various values of the smoothing parameters  $q$  and  $\beta$  of Equation (15). For each pair  $(q, \beta)$ , the number of replications is equal to 250. All values of the RMSE are multiplied by 100.

| $q$ | $\beta$ |       |       |       |       |       |       |       |       |       |
|-----|---------|-------|-------|-------|-------|-------|-------|-------|-------|-------|
|     | 0.90    | 0.91  | 0.92  | 0.93  | 0.94  | 0.95  | 0.96  | 0.97  | 0.98  | 0.99  |
| 5   | 12.38   | 12.38 | 12.32 | 12.50 | 12.42 | 12.51 | 12.52 | 12.53 | 12.57 | 12.66 |
| 6   | 12.25   | 12.41 | 12.31 | 12.36 | 12.29 | 12.37 | 12.43 | 12.35 | 12.32 | 12.31 |
| 7   | 12.16   | 12.27 | 12.37 | 12.18 | 12.36 | 12.27 | 12.24 | 12.32 | 12.38 | 12.16 |
| 8   | 12.21   | 12.31 | 12.27 | 12.11 | 12.11 | 12.24 | 12.22 | 12.11 | 12.44 | 12.19 |
| 9   | 12.19   | 12.30 | 12.21 | 12.14 | 12.17 | 12.15 | 12.15 | 12.19 | 12.22 | 12.19 |
| 10  | 12.20   | 12.16 | 12.13 | 12.08 | 12.10 | 12.17 | 12.28 | 12.32 | 12.20 | 12.13 |

**Table SM.34:** Sample Root Mean Squared Error (RMSE) for  $\hat{\sigma}$  of model (1) obtained by means of Monte Carlo simulations for various values of the smoothing parameters  $q$  and  $\beta$  of Equation (15). For each pair  $(q, \beta)$ , the number of replications is equal to 250. All values of the RMSE are multiplied by 100.

| $q$ | $\beta$ |       |       |       |       |       |       |       |       |       |
|-----|---------|-------|-------|-------|-------|-------|-------|-------|-------|-------|
|     | 0.90    | 0.91  | 0.92  | 0.93  | 0.94  | 0.95  | 0.96  | 0.97  | 0.98  | 0.99  |
| 5   | 19.57   | 18.79 | 18.48 | 18.25 | 17.99 | 17.82 | 17.60 | 17.09 | 17.36 | 16.91 |
| 6   | 18.74   | 18.21 | 17.96 | 18.15 | 17.24 | 17.56 | 17.66 | 17.45 | 16.88 | 16.86 |
| 7   | 19.18   | 18.87 | 18.90 | 17.97 | 17.96 | 17.78 | 17.84 | 17.39 | 17.53 | 17.60 |
| 8   | 20.26   | 19.84 | 20.05 | 19.58 | 19.90 | 19.79 | 19.08 | 18.16 | 18.69 | 19.11 |
| 9   | 22.16   | 23.48 | 22.78 | 22.74 | 22.01 | 21.63 | 21.43 | 20.89 | 21.32 | 20.88 |
| 10  | 25.23   | 24.72 | 23.79 | 24.35 | 23.12 | 22.94 | 22.68 | 22.85 | 22.70 | 22.76 |

**Table SM.35:** Computing times of model (1) obtained by means of Monte Carlo simulations for various values of the smoothing parameters  $q$  and  $\beta$  of Equation (15). For each pair  $(q, \beta)$ , the number of replications is equal to 250. The table reports the average computing times for one model, expressed in seconds.

|                              | $\sigma$ |       |       |       |       |
|------------------------------|----------|-------|-------|-------|-------|
| RMSE of $\hat{\beta}_0$      | 0.01     | 0.10  | 0.20  | 0.50  | 1.00  |
| AG quadrature ( $m = 1$ )    | 30.85    | 32.19 | 27.82 | 28.59 | 29.31 |
| AG quadrature ( $m = 3$ )    | 30.85    | 32.18 | 27.82 | 28.58 | 29.31 |
| AG quadrature ( $m = 5$ )    | 30.85    | 32.19 | 27.82 | 28.58 | 29.31 |
| Cross-entropy ( $N = 1000$ ) | 30.28    | 32.17 | 27.47 | 28.74 | 29.44 |
| Cross-entropy ( $N = 2000$ ) | 30.60    | 32.31 | 27.55 | 28.71 | 29.60 |
| Cross-entropy ( $N = 5000$ ) | 30.38    | 32.23 | 27.47 | 28.73 | 29.47 |
| RMSE of $\hat{\beta}_1$      |          |       |       |       |       |
| AG quadrature ( $m = 1$ )    | 35.81    | 45.97 | 40.33 | 38.72 | 41.78 |
| AG quadrature ( $m = 3$ )    | 35.80    | 45.96 | 40.32 | 38.71 | 41.78 |
| AG quadrature ( $m = 5$ )    | 35.81    | 45.97 | 40.33 | 38.72 | 41.78 |
| Cross-entropy ( $N = 1000$ ) | 35.90    | 45.65 | 39.93 | 39.17 | 42.13 |
| Cross-entropy ( $N = 2000$ ) | 35.22    | 45.25 | 40.03 | 38.81 | 42.16 |
| Cross-entropy ( $N = 5000$ ) | 35.42    | 45.52 | 40.16 | 38.94 | 41.94 |
| RMSE of $\hat{\beta}_2$      |          |       |       |       |       |
| AG quadrature ( $m = 1$ )    | 53.39    | 57.88 | 52.47 | 57.48 | 57.77 |
| AG quadrature ( $m = 3$ )    | 53.38    | 57.86 | 52.46 | 57.46 | 57.77 |
| AG quadrature ( $m = 5$ )    | 53.39    | 57.87 | 52.47 | 57.47 | 57.77 |
| Cross-entropy ( $N = 1000$ ) | 52.61    | 58.28 | 52.48 | 58.24 | 57.90 |
| Cross-entropy ( $N = 2000$ ) | 52.22    | 57.93 | 52.71 | 56.81 | 58.09 |
| Cross-entropy ( $N = 5000$ ) | 52.02    | 58.06 | 52.62 | 57.52 | 57.92 |
| RMSE of $\hat{\beta}_3$      |          |       |       |       |       |
| AG quadrature ( $m = 1$ )    | 69.37    | 84.50 | 72.04 | 72.93 | 77.63 |
| AG quadrature ( $m = 3$ )    | 69.37    | 84.49 | 72.03 | 72.92 | 77.62 |
| AG quadrature ( $m = 5$ )    | 69.38    | 84.51 | 72.04 | 72.93 | 77.63 |
| Cross-entropy ( $N = 1000$ ) | 67.95    | 85.13 | 71.55 | 73.92 | 78.84 |
| Cross-entropy ( $N = 2000$ ) | 67.36    | 84.24 | 71.58 | 73.14 | 78.55 |
| Cross-entropy ( $N = 5000$ ) | 67.42    | 84.99 | 71.73 | 73.23 | 78.57 |
| RMSE of $\hat{\sigma}$       |          |       |       |       |       |
| AG quadrature ( $m = 1$ )    | 28.08    | 26.17 | 25.44 | 43.18 | 90.11 |
| AG quadrature ( $m = 3$ )    | 28.10    | 26.20 | 25.45 | 43.18 | 90.10 |
| AG quadrature ( $m = 5$ )    | 28.13    | 26.23 | 25.47 | 43.18 | 90.09 |
| Cross-entropy ( $N = 1000$ ) | 40.02    | 30.85 | 22.20 | 15.83 | 63.34 |
| Cross-entropy ( $N = 2000$ ) | 39.92    | 31.72 | 21.83 | 15.84 | 63.15 |
| Cross-entropy ( $N = 5000$ ) | 40.01    | 31.36 | 22.00 | 15.76 | 63.13 |
| Computing time               |          |       |       |       |       |
| AG quadrature ( $m = 1$ )    | 0.30     | 0.21  | 0.19  | 0.19  | 0.19  |
| AG quadrature ( $m = 3$ )    | 0.26     | 0.24  | 0.22  | 0.22  | 0.22  |
| AG quadrature ( $m = 5$ )    | 0.28     | 0.26  | 0.24  | 0.24  | 0.24  |
| Cross-entropy ( $N = 1000$ ) | 23.65    | 21.79 | 20.47 | 19.83 | 20.34 |
| Cross-entropy ( $N = 2000$ ) | 45.32    | 41.21 | 40.93 | 39.19 | 39.76 |
| Cross-entropy ( $N = 5000$ ) | 110.79   | 98.41 | 99.85 | 98.27 | 97.90 |

**Table SM.36:** Sample Root Mean Squared Error (RMSE) for all the parameters of model (1) and computing times obtained by means of Monte Carlo simulation for various estimation techniques and various values of  $\sigma$  and for  $G = 8$  and  $n = 250$ . For each value of  $\sigma$ , the number of replications is equal to 200. All the values of the RMSE are multiplied by 100; computing times are in seconds.

|                              | $\sigma$ |       |       |        |        |
|------------------------------|----------|-------|-------|--------|--------|
|                              | 0.01     | 0.10  | 0.20  | 0.50   | 1.00   |
| Bias of $\hat{\beta}_0$      |          |       |       |        |        |
| AG quadrature ( $m = 1$ )    | 6.19     | 7.60  | 3.07  | 9.12   | 7.34   |
| AG quadrature ( $m = 3$ )    | 6.19     | 7.59  | 3.06  | 9.12   | 7.34   |
| AG quadrature ( $m = 5$ )    | 6.19     | 7.60  | 3.06  | 9.12   | 7.34   |
| Cross-entropy ( $N = 1000$ ) | 6.15     | 7.57  | 3.21  | 9.48   | 7.24   |
| Cross-entropy ( $N = 2000$ ) | 6.00     | 7.67  | 3.01  | 9.53   | 7.54   |
| Cross-entropy ( $N = 5000$ ) | 6.14     | 7.70  | 3.14  | 9.54   | 7.55   |
| Bias of $\hat{\beta}_1$      |          |       |       |        |        |
| AG quadrature ( $m = 1$ )    | 11.05    | 16.27 | 10.10 | 12.69  | 10.19  |
| AG quadrature ( $m = 3$ )    | 11.04    | 16.27 | 10.09 | 12.69  | 10.19  |
| AG quadrature ( $m = 5$ )    | 11.05    | 16.28 | 10.09 | 12.69  | 10.19  |
| Cross-entropy ( $N = 1000$ ) | 11.45    | 15.96 | 10.03 | 13.13  | 10.60  |
| Cross-entropy ( $N = 2000$ ) | 10.88    | 16.08 | 10.15 | 12.72  | 10.66  |
| Cross-entropy ( $N = 5000$ ) | 10.82    | 16.18 | 10.26 | 12.91  | 10.72  |
| Bias of $\hat{\beta}_2$      |          |       |       |        |        |
| AG quadrature ( $m = 1$ )    | 18.73    | 21.32 | 10.75 | 19.64  | 15.19  |
| AG quadrature ( $m = 3$ )    | 18.73    | 21.31 | 10.74 | 19.64  | 15.19  |
| AG quadrature ( $m = 5$ )    | 18.74    | 21.32 | 10.75 | 19.64  | 15.19  |
| Cross-entropy ( $N = 1000$ ) | 18.99    | 21.24 | 11.43 | 20.33  | 15.33  |
| Cross-entropy ( $N = 2000$ ) | 18.67    | 21.07 | 10.85 | 19.68  | 15.63  |
| Cross-entropy ( $N = 5000$ ) | 18.53    | 21.30 | 11.27 | 20.05  | 15.83  |
| Bias of $\hat{\beta}_3$      |          |       |       |        |        |
| AG quadrature ( $m = 1$ )    | 23.76    | 32.95 | 19.61 | 28.74  | 26.11  |
| AG quadrature ( $m = 3$ )    | 23.76    | 32.96 | 19.61 | 28.73  | 26.11  |
| AG quadrature ( $m = 5$ )    | 23.77    | 32.97 | 19.61 | 28.74  | 26.12  |
| Cross-entropy ( $N = 1000$ ) | 23.94    | 32.51 | 19.39 | 29.35  | 26.38  |
| Cross-entropy ( $N = 2000$ ) | 23.79    | 32.83 | 19.35 | 29.21  | 26.63  |
| Cross-entropy ( $N = 5000$ ) | 23.65    | 33.04 | 19.75 | 29.39  | 26.71  |
| Bias of $\hat{\sigma}$       |          |       |       |        |        |
| AG quadrature ( $m = 1$ )    | 14.23    | 5.16  | -5.54 | -36.41 | -87.19 |
| AG quadrature ( $m = 3$ )    | 14.24    | 5.18  | -5.53 | -36.40 | -87.18 |
| AG quadrature ( $m = 5$ )    | 14.26    | 5.19  | -5.52 | -36.39 | -87.16 |
| Cross-entropy ( $N = 1000$ ) | 38.39    | 28.80 | 19.30 | -11.40 | -62.39 |
| Cross-entropy ( $N = 2000$ ) | 38.41    | 29.51 | 19.09 | -11.40 | -62.19 |
| Cross-entropy ( $N = 5000$ ) | 38.50    | 29.26 | 19.23 | -11.10 | -62.19 |

**Table SM.37:** Bias for all the parameters of model (1) obtained by means of Monte Carlo simulation for various estimation techniques and various values of  $\sigma$  and for  $G = 8$  and  $n = 250$ . For each value of  $\sigma$ , the number of replications is equal to 200. All the values of the bias are multiplied by 100.

| RMSE of $\hat{\beta}_0$      | $\sigma$ |       |       |        |        |
|------------------------------|----------|-------|-------|--------|--------|
|                              | 0.01     | 0.10  | 0.20  | 0.50   | 1.00   |
| AG quadrature ( $m = 1$ )    | 29.16    | 28.73 | 30.61 | 30.34  | 30.52  |
| AG quadrature ( $m = 3$ )    | 29.13    | 28.71 | 30.59 | 30.33  | 30.50  |
| AG quadrature ( $m = 5$ )    | 29.14    | 28.72 | 30.60 | 30.33  | 30.51  |
| Cross-entropy ( $N = 1000$ ) | 28.73    | 27.90 | 30.03 | 30.11  | 30.38  |
| Cross-entropy ( $N = 2000$ ) | 28.59    | 28.36 | 29.92 | 29.80  | 30.76  |
| Cross-entropy ( $N = 5000$ ) | 28.69    | 28.20 | 29.76 | 29.86  | 30.54  |
| RMSE of $\hat{\beta}_1$      |          |       |       |        |        |
| AG quadrature ( $m = 1$ )    | 48.02    | 43.05 | 48.24 | 45.08  | 49.16  |
| AG quadrature ( $m = 3$ )    | 47.99    | 43.04 | 48.23 | 45.05  | 49.14  |
| AG quadrature ( $m = 5$ )    | 48.02    | 43.08 | 48.24 | 45.07  | 49.15  |
| Cross-entropy ( $N = 1000$ ) | 46.05    | 39.59 | 48.68 | 44.08  | 48.71  |
| Cross-entropy ( $N = 2000$ ) | 45.63    | 39.67 | 48.61 | 44.49  | 49.29  |
| Cross-entropy ( $N = 5000$ ) | 45.90    | 39.97 | 48.42 | 44.39  | 48.94  |
| RMSE of $\hat{\beta}_2$      |          |       |       |        |        |
| AG quadrature ( $m = 1$ )    | 61.14    | 63.12 | 56.78 | 68.26  | 64.05  |
| AG quadrature ( $m = 3$ )    | 61.09    | 63.17 | 56.76 | 68.19  | 64.00  |
| AG quadrature ( $m = 5$ )    | 61.13    | 63.23 | 56.77 | 68.21  | 64.02  |
| Cross-entropy ( $N = 1000$ ) | 58.60    | 56.62 | 56.67 | 67.54  | 63.38  |
| Cross-entropy ( $N = 2000$ ) | 57.98    | 57.30 | 56.85 | 67.70  | 63.88  |
| Cross-entropy ( $N = 5000$ ) | 58.44    | 57.57 | 56.56 | 67.43  | 63.87  |
| RMSE of $\hat{\beta}_3$      |          |       |       |        |        |
| AG quadrature ( $m = 1$ )    | 79.63    | 83.91 | 80.30 | 80.85  | 89.07  |
| AG quadrature ( $m = 3$ )    | 79.60    | 83.98 | 80.28 | 80.79  | 89.02  |
| AG quadrature ( $m = 5$ )    | 79.64    | 84.06 | 80.31 | 80.82  | 89.06  |
| Cross-entropy ( $N = 1000$ ) | 77.56    | 74.08 | 79.29 | 80.55  | 88.37  |
| Cross-entropy ( $N = 2000$ ) | 77.03    | 75.18 | 79.35 | 81.03  | 88.66  |
| Cross-entropy ( $N = 5000$ ) | 77.63    | 75.04 | 79.05 | 80.37  | 88.39  |
| RMSE of $\hat{\sigma}$       |          |       |       |        |        |
| AG quadrature ( $m = 1$ )    | 34.08    | 33.94 | 28.05 | 40.08  | 85.46  |
| AG quadrature ( $m = 3$ )    | 34.13    | 34.04 | 28.07 | 40.09  | 85.45  |
| AG quadrature ( $m = 5$ )    | 34.21    | 34.14 | 28.13 | 40.10  | 85.43  |
| Cross-entropy ( $N = 1000$ ) | 40.45    | 31.83 | 22.08 | 13.30  | 60.38  |
| Cross-entropy ( $N = 2000$ ) | 40.83    | 32.74 | 22.45 | 13.34  | 60.07  |
| Cross-entropy ( $N = 5000$ ) | 41.02    | 32.50 | 22.37 | 13.13  | 60.03  |
| Computing time               |          |       |       |        |        |
| AG quadrature ( $m = 1$ )    | 0.20     | 0.20  | 0.19  | 0.20   | 0.21   |
| AG quadrature ( $m = 3$ )    | 0.23     | 0.23  | 0.23  | 0.23   | 0.24   |
| AG quadrature ( $m = 5$ )    | 0.25     | 0.25  | 0.25  | 0.26   | 0.26   |
| Cross-entropy ( $N = 1000$ ) | 20.28    | 19.68 | 20.37 | 20.25  | 21.02  |
| Cross-entropy ( $N = 2000$ ) | 39.39    | 39.18 | 40.20 | 40.67  | 42.74  |
| Cross-entropy ( $N = 5000$ ) | 99.93    | 98.18 | 99.43 | 101.17 | 105.74 |

**Table SM.38:** Sample Root Mean Squared Error (RMSE) for all the parameters of model (1) and computing times obtained by means of Monte Carlo simulation for various estimation techniques and various values of  $\sigma$  and for  $G = 12$  and  $n = 250$ . For each value of  $\sigma$ , the number of replications is equal to 200. All the values of the RMSE are multiplied by 100; computing times are in seconds.

|                              | $\sigma$ |       |       |        |        |
|------------------------------|----------|-------|-------|--------|--------|
|                              | 0.01     | 0.10  | 0.20  | 0.50   | 1.00   |
| Bias of $\hat{\beta}_0$      |          |       |       |        |        |
| AG quadrature ( $m = 1$ )    | 6.03     | 9.90  | 9.48  | 4.00   | 11.49  |
| AG quadrature ( $m = 3$ )    | 6.02     | 9.89  | 9.47  | 3.99   | 11.48  |
| AG quadrature ( $m = 5$ )    | 6.03     | 9.90  | 9.48  | 4.00   | 11.48  |
| Cross-entropy ( $N = 1000$ ) | 5.74     | 9.11  | 8.91  | 3.62   | 11.34  |
| Cross-entropy ( $N = 2000$ ) | 5.64     | 9.54  | 8.82  | 3.49   | 11.50  |
| Cross-entropy ( $N = 5000$ ) | 5.74     | 9.13  | 8.92  | 3.72   | 11.40  |
| Bias of $\hat{\beta}_1$      |          |       |       |        |        |
| AG quadrature ( $m = 1$ )    | 14.15    | 16.00 | 18.24 | 13.98  | 20.23  |
| AG quadrature ( $m = 3$ )    | 14.14    | 15.99 | 18.23 | 13.97  | 20.22  |
| AG quadrature ( $m = 5$ )    | 14.16    | 16.01 | 18.25 | 13.98  | 20.23  |
| Cross-entropy ( $N = 1000$ ) | 12.75    | 13.90 | 17.36 | 12.81  | 19.51  |
| Cross-entropy ( $N = 2000$ ) | 12.86    | 14.25 | 17.34 | 12.86  | 19.89  |
| Cross-entropy ( $N = 5000$ ) | 13.06    | 14.15 | 17.27 | 13.22  | 19.67  |
| Bias of $\hat{\beta}_2$      |          |       |       |        |        |
| AG quadrature ( $m = 1$ )    | 21.36    | 21.37 | 23.86 | 22.08  | 26.88  |
| AG quadrature ( $m = 3$ )    | 21.35    | 21.37 | 23.85 | 22.06  | 26.85  |
| AG quadrature ( $m = 5$ )    | 21.37    | 21.41 | 23.87 | 22.08  | 26.87  |
| Cross-entropy ( $N = 1000$ ) | 19.42    | 18.13 | 22.91 | 20.45  | 25.63  |
| Cross-entropy ( $N = 2000$ ) | 19.18    | 18.50 | 22.74 | 20.83  | 26.25  |
| Cross-entropy ( $N = 5000$ ) | 19.89    | 18.42 | 22.71 | 20.91  | 26.27  |
| Bias of $\hat{\beta}_3$      |          |       |       |        |        |
| AG quadrature ( $m = 1$ )    | 30.73    | 30.08 | 31.64 | 25.80  | 42.36  |
| AG quadrature ( $m = 3$ )    | 30.73    | 30.09 | 31.64 | 25.79  | 42.35  |
| AG quadrature ( $m = 5$ )    | 30.76    | 30.14 | 31.67 | 25.82  | 42.37  |
| Cross-entropy ( $N = 1000$ ) | 28.61    | 25.41 | 29.87 | 23.19  | 41.26  |
| Cross-entropy ( $N = 2000$ ) | 28.18    | 26.14 | 30.06 | 24.14  | 41.75  |
| Cross-entropy ( $N = 5000$ ) | 29.01    | 25.67 | 29.74 | 24.34  | 41.45  |
| Bias of $\hat{\sigma}$       |          |       |       |        |        |
| AG quadrature ( $m = 1$ )    | 18.54    | 11.62 | -1.47 | -29.10 | -81.52 |
| AG quadrature ( $m = 3$ )    | 18.57    | 11.66 | -1.45 | -29.08 | -81.51 |
| AG quadrature ( $m = 5$ )    | 18.61    | 11.70 | -1.41 | -29.04 | -81.48 |
| Cross-entropy ( $N = 1000$ ) | 39.38    | 30.41 | 19.96 | -9.36  | -59.66 |
| Cross-entropy ( $N = 2000$ ) | 39.78    | 31.18 | 20.32 | -9.27  | -59.37 |
| Cross-entropy ( $N = 5000$ ) | 40.04    | 31.06 | 20.36 | -9.25  | -59.35 |

**Table SM.39:** Bias for all the parameters of model (1) obtained by means of Monte Carlo simulation for various estimation techniques and various values of  $\sigma$  and for  $G = 12$  and  $n = 250$ . For each value of  $\sigma$ , the number of replications is equal to 200. All the values of the bias are multiplied by 100.



| RMSE of $\hat{\beta}_0$      | $\sigma$ |        |        |        |        |
|------------------------------|----------|--------|--------|--------|--------|
|                              | 0.01     | 0.10   | 0.20   | 0.50   | 1.00   |
| AG quadrature ( $m = 1$ )    | 30.26    | 37.22  | 37.24  | 30.79  | 33.94  |
| AG quadrature ( $m = 3$ )    | 30.18    | 36.77  | 36.98  | 30.70  | 33.72  |
| AG quadrature ( $m = 5$ )    | 30.22    | 37.04  | 37.11  | 30.75  | 33.85  |
| Cross-entropy ( $N = 1000$ ) | 30.05    | 33.30  | 34.57  | 29.43  | 31.54  |
| Cross-entropy ( $N = 2000$ ) | 30.26    | 33.20  | 34.51  | 29.51  | 31.52  |
| Cross-entropy ( $N = 5000$ ) | 30.36    | 33.14  | 34.54  | 29.62  | 31.44  |
| RMSE of $\hat{\beta}_1$      |          |        |        |        |        |
| AG quadrature ( $m = 1$ )    | 48.92    | 53.11  | 56.87  | 47.95  | 44.24  |
| AG quadrature ( $m = 3$ )    | 48.75    | 52.43  | 56.49  | 47.82  | 43.95  |
| AG quadrature ( $m = 5$ )    | 48.88    | 53.10  | 56.74  | 47.92  | 44.17  |
| Cross-entropy ( $N = 1000$ ) | 47.57    | 43.75  | 52.12  | 46.77  | 40.38  |
| Cross-entropy ( $N = 2000$ ) | 47.18    | 43.14  | 51.52  | 46.67  | 40.36  |
| Cross-entropy ( $N = 5000$ ) | 47.60    | 43.12  | 52.08  | 46.77  | 40.43  |
| RMSE of $\hat{\beta}_2$      |          |        |        |        |        |
| AG quadrature ( $m = 1$ )    | 58.91    | 80.12  | 74.15  | 70.76  | 59.14  |
| AG quadrature ( $m = 3$ )    | 58.55    | 78.91  | 73.53  | 70.52  | 58.64  |
| AG quadrature ( $m = 5$ )    | 58.80    | 79.89  | 73.98  | 70.71  | 59.01  |
| Cross-entropy ( $N = 1000$ ) | 55.30    | 66.05  | 65.86  | 66.99  | 54.73  |
| Cross-entropy ( $N = 2000$ ) | 54.24    | 64.89  | 65.21  | 67.29  | 54.51  |
| Cross-entropy ( $N = 5000$ ) | 54.93    | 64.63  | 65.64  | 67.70  | 54.21  |
| RMSE of $\hat{\beta}_3$      |          |        |        |        |        |
| AG quadrature ( $m = 1$ )    | 82.07    | 108.53 | 104.37 | 95.68  | 80.64  |
| AG quadrature ( $m = 3$ )    | 81.75    | 106.90 | 103.56 | 95.51  | 80.14  |
| AG quadrature ( $m = 5$ )    | 82.02    | 108.45 | 104.18 | 95.81  | 80.64  |
| Cross-entropy ( $N = 1000$ ) | 79.08    | 88.06  | 92.33  | 89.50  | 74.04  |
| Cross-entropy ( $N = 2000$ ) | 78.55    | 86.77  | 91.90  | 89.64  | 74.32  |
| Cross-entropy ( $N = 5000$ ) | 78.94    | 86.17  | 92.03  | 89.79  | 73.75  |
| RMSE of $\hat{\sigma}$       |          |        |        |        |        |
| AG quadrature ( $m = 1$ )    | 38.16    | 43.79  | 39.55  | 43.05  | 86.16  |
| AG quadrature ( $m = 3$ )    | 37.89    | 42.99  | 38.81  | 42.98  | 86.06  |
| AG quadrature ( $m = 5$ )    | 38.28    | 43.79  | 39.42  | 43.14  | 86.09  |
| Cross-entropy ( $N = 1000$ ) | 39.61    | 32.14  | 22.40  | 10.93  | 59.90  |
| Cross-entropy ( $N = 2000$ ) | 40.30    | 32.01  | 22.60  | 10.79  | 59.73  |
| Cross-entropy ( $N = 5000$ ) | 40.23    | 32.50  | 22.76  | 10.57  | 59.65  |
| Computing time               |          |        |        |        |        |
| AG quadrature ( $m = 1$ )    | 0.34     | 0.24   | 0.22   | 0.22   | 0.21   |
| AG quadrature ( $m = 3$ )    | 0.30     | 0.28   | 0.26   | 0.26   | 0.24   |
| AG quadrature ( $m = 5$ )    | 0.33     | 0.31   | 0.28   | 0.28   | 0.27   |
| Cross-entropy ( $N = 1000$ ) | 26.38    | 23.24  | 22.49  | 22.23  | 21.55  |
| Cross-entropy ( $N = 2000$ ) | 49.39    | 43.91  | 43.95  | 42.75  | 43.42  |
| Cross-entropy ( $N = 5000$ ) | 116.40   | 108.10 | 108.12 | 107.31 | 107.54 |

**Table SM.40:** Sample Root Mean Squared Error (RMSE) for all the parameters of model (1) obtained by means of Monte Carlo simulations for various estimation techniques and various values of  $\sigma$  and for  $G = 25$  and  $n = 250$ . For each value of  $\sigma$ , the number of replications is equal to 200. All values of the RMSE are multiplied by 100.

| Bias of $\hat{\beta}_0$      | $\sigma$ |       |       |        |        |
|------------------------------|----------|-------|-------|--------|--------|
|                              | 0.01     | 0.10  | 0.20  | 0.50   | 1.00   |
| AG quadrature ( $m = 1$ )    | 9.39     | 10.54 | 11.71 | 11.28  | 8.15   |
| AG quadrature ( $m = 3$ )    | 9.32     | 10.35 | 11.56 | 11.22  | 8.05   |
| AG quadrature ( $m = 5$ )    | 9.36     | 10.47 | 11.65 | 11.27  | 8.11   |
| Cross-entropy ( $N = 1000$ ) | 8.55     | 7.79  | 9.23  | 9.83   | 7.00   |
| Cross-entropy ( $N = 2000$ ) | 8.53     | 7.97  | 9.51  | 9.90   | 7.00   |
| Cross-entropy ( $N = 5000$ ) | 8.66     | 7.92  | 9.48  | 10.00  | 7.03   |
| Bias of $\hat{\beta}_1$      |          |       |       |        |        |
| AG quadrature ( $m = 1$ )    | 17.25    | 19.22 | 25.19 | 18.12  | 15.83  |
| AG quadrature ( $m = 3$ )    | 17.17    | 19.00 | 25.00 | 18.06  | 15.71  |
| AG quadrature ( $m = 5$ )    | 17.25    | 19.22 | 25.15 | 18.14  | 15.82  |
| Cross-entropy ( $N = 1000$ ) | 15.30    | 14.15 | 20.81 | 16.02  | 13.41  |
| Cross-entropy ( $N = 2000$ ) | 15.32    | 14.02 | 20.72 | 15.74  | 13.08  |
| Cross-entropy ( $N = 5000$ ) | 15.35    | 14.21 | 21.09 | 16.05  | 13.17  |
| Bias of $\hat{\beta}_2$      |          |       |       |        |        |
| AG quadrature ( $m = 1$ )    | 20.34    | 30.40 | 32.84 | 26.41  | 20.31  |
| AG quadrature ( $m = 3$ )    | 20.21    | 30.01 | 32.58 | 26.30  | 20.12  |
| AG quadrature ( $m = 5$ )    | 20.33    | 30.35 | 32.80 | 26.44  | 20.28  |
| Cross-entropy ( $N = 1000$ ) | 17.23    | 23.03 | 26.29 | 22.48  | 16.45  |
| Cross-entropy ( $N = 2000$ ) | 17.01    | 22.72 | 26.52 | 22.69  | 16.90  |
| Cross-entropy ( $N = 5000$ ) | 17.11    | 22.89 | 27.08 | 22.80  | 16.61  |
| Bias of $\hat{\beta}_3$      |          |       |       |        |        |
| AG quadrature ( $m = 1$ )    | 34.85    | 41.02 | 50.75 | 40.21  | 31.64  |
| AG quadrature ( $m = 3$ )    | 34.72    | 40.54 | 50.41 | 40.12  | 31.45  |
| AG quadrature ( $m = 5$ )    | 34.88    | 41.02 | 50.72 | 40.30  | 31.66  |
| Cross-entropy ( $N = 1000$ ) | 30.74    | 30.75 | 41.74 | 34.69  | 26.73  |
| Cross-entropy ( $N = 2000$ ) | 30.79    | 30.29 | 41.69 | 35.15  | 27.18  |
| Cross-entropy ( $N = 5000$ ) | 30.82    | 30.49 | 42.10 | 34.91  | 26.77  |
| Bias of $\hat{\sigma}$       |          |       |       |        |        |
| AG quadrature ( $m = 1$ )    | 19.54    | 16.23 | 5.88  | -27.35 | -78.87 |
| AG quadrature ( $m = 3$ )    | 19.49    | 15.94 | 5.67  | -27.40 | -79.02 |
| AG quadrature ( $m = 5$ )    | 19.65    | 16.26 | 5.92  | -27.23 | -78.83 |
| Cross-entropy ( $N = 1000$ ) | 39.14    | 31.12 | 21.30 | -8.83  | -59.51 |
| Cross-entropy ( $N = 2000$ ) | 39.81    | 31.14 | 21.50 | -8.65  | -59.33 |
| Cross-entropy ( $N = 5000$ ) | 39.78    | 31.59 | 21.68 | -8.39  | -59.30 |

**Table SM.41:** Bias for all the parameters of model (1) obtained by means of Monte Carlo simulation for various estimation techniques and various values of  $\sigma$  and for  $G = 25$  and  $n = 250$ . For each value of  $\sigma$ , the number of replications is equal to 200. All the values of the bias are multiplied by 100.

| RMSE of $\hat{\beta}_0$      | $\sigma$ |        |        |        |        |
|------------------------------|----------|--------|--------|--------|--------|
|                              | 0.01     | 0.10   | 0.20   | 0.50   | 1.00   |
| AG quadrature ( $m = 1$ )    | 269.64   | 137.11 | 45.04  | 34.29  | 187.36 |
| AG quadrature ( $m = 3$ )    | 34.79    | 134.51 | 38.49  | 33.48  | 126.86 |
| AG quadrature ( $m = 5$ )    | 35.84    | 113.69 | 39.38  | 33.79  | 258.89 |
| Cross-entropy ( $N = 1000$ ) | 29.08    | 28.08  | 32.47  | 31.94  | 30.68  |
| Cross-entropy ( $N = 2000$ ) | 29.42    | 28.18  | 32.36  | 31.82  | 30.76  |
| Cross-entropy ( $N = 5000$ ) | 29.07    | 28.10  | 32.41  | 31.98  | 30.76  |
| RMSE of $\hat{\beta}_1$      |          |        |        |        |        |
| AG quadrature ( $m = 1$ )    | 450.98   | 212.74 | 71.31  | 45.50  | 483.74 |
| AG quadrature ( $m = 3$ )    | 50.70    | 225.85 | 53.12  | 44.40  | 294.71 |
| AG quadrature ( $m = 5$ )    | 52.70    | 219.29 | 54.83  | 44.92  | 423.53 |
| Cross-entropy ( $N = 1000$ ) | 41.91    | 39.34  | 43.67  | 41.86  | 51.45  |
| Cross-entropy ( $N = 2000$ ) | 41.93    | 39.22  | 42.95  | 41.33  | 51.21  |
| Cross-entropy ( $N = 5000$ ) | 41.88    | 39.58  | 43.29  | 41.63  | 51.61  |
| RMSE of $\hat{\beta}_2$      |          |        |        |        |        |
| AG quadrature ( $m = 1$ )    | 523.82   | 363.11 | 87.71  | 68.97  | 658.52 |
| AG quadrature ( $m = 3$ )    | 72.79    | 403.71 | 69.50  | 66.92  | 392.21 |
| AG quadrature ( $m = 5$ )    | 75.80    | 392.26 | 71.83  | 67.84  | 645.28 |
| Cross-entropy ( $N = 1000$ ) | 55.51    | 53.77  | 56.01  | 61.04  | 62.51  |
| Cross-entropy ( $N = 2000$ ) | 55.61    | 53.81  | 55.72  | 60.59  | 61.95  |
| Cross-entropy ( $N = 5000$ ) | 55.33    | 53.60  | 55.67  | 60.93  | 62.45  |
| RMSE of $\hat{\beta}_3$      |          |        |        |        |        |
| AG quadrature ( $m = 1$ )    | 951.81   | 486.40 | 128.73 | 90.05  | 965.47 |
| AG quadrature ( $m = 3$ )    | 103.17   | 524.54 | 98.23  | 87.73  | 516.14 |
| AG quadrature ( $m = 5$ )    | 107.86   | 483.75 | 101.66 | 88.86  | 926.51 |
| Cross-entropy ( $N = 1000$ ) | 76.99    | 73.74  | 78.09  | 81.96  | 81.37  |
| Cross-entropy ( $N = 2000$ ) | 77.86    | 73.49  | 77.29  | 80.56  | 81.11  |
| Cross-entropy ( $N = 5000$ ) | 77.61    | 73.81  | 78.02  | 81.16  | 81.62  |
| RMSE of $\hat{\sigma}$       |          |        |        |        |        |
| AG quadrature ( $m = 1$ )    | 561.45   | 393.75 | 73.21  | 47.91  | 801.28 |
| AG quadrature ( $m = 3$ )    | 58.16    | 305.73 | 51.27  | 45.98  | 250.10 |
| AG quadrature ( $m = 5$ )    | 61.32    | 237.42 | 54.14  | 46.99  | 286.78 |
| Cross-entropy ( $N = 1000$ ) | 40.51    | 31.54  | 22.06  | 10.81  | 59.19  |
| Cross-entropy ( $N = 2000$ ) | 41.24    | 31.77  | 22.74  | 10.32  | 58.69  |
| Cross-entropy ( $N = 5000$ ) | 41.24    | 31.83  | 22.63  | 10.13  | 58.45  |
| Computing time               |          |        |        |        |        |
| AG quadrature ( $m = 1$ )    | 0.27     | 0.25   | 0.25   | 0.24   | 0.26   |
| AG quadrature ( $m = 3$ )    | 0.29     | 0.29   | 0.29   | 0.28   | 0.30   |
| AG quadrature ( $m = 5$ )    | 0.32     | 0.32   | 0.31   | 0.30   | 0.32   |
| Cross-entropy ( $N = 1000$ ) | 24.39    | 25.06  | 24.59  | 24.83  | 24.80  |
| Cross-entropy ( $N = 2000$ ) | 48.07    | 48.42  | 49.11  | 48.78  | 48.45  |
| Cross-entropy ( $N = 5000$ ) | 119.64   | 120.12 | 120.57 | 120.86 | 120.87 |

**Table SM.42:** Sample Root Mean Squared Error (RMSE) for all the parameters of model (1) obtained by means of Monte Carlo simulations for various estimation techniques and various values of  $\sigma$  and for  $G = 50$  and  $n = 250$ . For each value of  $\sigma$ , the number of replications is equal to 200. All values of the RMSE are multiplied by 100.

|                              | $\sigma$ |       |       |        |        |
|------------------------------|----------|-------|-------|--------|--------|
|                              | 0.01     | 0.10  | 0.20  | 0.50   | 1.00   |
| Bias of $\hat{\beta}_0$      |          |       |       |        |        |
| AG quadrature ( $m = 1$ )    | 30.67    | 20.75 | 12.78 | 9.97   | 30.72  |
| AG quadrature ( $m = 3$ )    | 11.26    | 19.11 | 10.56 | 9.51   | 25.54  |
| AG quadrature ( $m = 5$ )    | 11.78    | 15.16 | 11.02 | 9.73   | 33.17  |
| Cross-entropy ( $N = 1000$ ) | 7.10     | 3.02  | 6.25  | 7.31   | 9.96   |
| Cross-entropy ( $N = 2000$ ) | 7.41     | 2.91  | 6.15  | 7.10   | 9.79   |
| Cross-entropy ( $N = 5000$ ) | 7.25     | 3.02  | 6.40  | 7.06   | 9.94   |
| Bias of $\hat{\beta}_1$      |          |       |       |        |        |
| AG quadrature ( $m = 1$ )    | 54.32    | 39.76 | 29.89 | 21.16  | 69.91  |
| AG quadrature ( $m = 3$ )    | 22.05    | 39.40 | 25.84 | 20.44  | 56.04  |
| AG quadrature ( $m = 5$ )    | 23.04    | 34.15 | 26.68 | 20.86  | 60.04  |
| Cross-entropy ( $N = 1000$ ) | 13.83    | 10.41 | 17.50 | 15.44  | 20.49  |
| Cross-entropy ( $N = 2000$ ) | 14.00    | 10.73 | 17.71 | 15.32  | 20.01  |
| Cross-entropy ( $N = 5000$ ) | 13.92    | 10.90 | 17.60 | 15.57  | 20.22  |
| Bias of $\hat{\beta}_2$      |          |       |       |        |        |
| AG quadrature ( $m = 1$ )    | 69.82    | 64.62 | 40.90 | 27.08  | 87.97  |
| AG quadrature ( $m = 3$ )    | 31.76    | 65.68 | 35.98 | 25.97  | 68.50  |
| AG quadrature ( $m = 5$ )    | 33.19    | 56.20 | 37.18 | 26.60  | 79.86  |
| Cross-entropy ( $N = 1000$ ) | 19.31    | 16.70 | 24.55 | 18.31  | 21.26  |
| Cross-entropy ( $N = 2000$ ) | 19.43    | 16.81 | 24.04 | 18.21  | 20.67  |
| Cross-entropy ( $N = 5000$ ) | 19.36    | 16.82 | 24.27 | 18.61  | 21.10  |
| Bias of $\hat{\beta}_3$      |          |       |       |        |        |
| AG quadrature ( $m = 1$ )    | 114.41   | 90.78 | 59.69 | 38.23  | 120.01 |
| AG quadrature ( $m = 3$ )    | 46.30    | 91.51 | 52.34 | 36.87  | 87.84  |
| AG quadrature ( $m = 5$ )    | 48.33    | 76.99 | 54.01 | 37.70  | 109.19 |
| Cross-entropy ( $N = 1000$ ) | 28.20    | 26.64 | 36.20 | 27.36  | 26.13  |
| Cross-entropy ( $N = 2000$ ) | 29.27    | 26.94 | 35.63 | 26.64  | 25.91  |
| Cross-entropy ( $N = 5000$ ) | 29.10    | 27.04 | 36.03 | 27.04  | 26.28  |
| Bias of $\hat{\sigma}$       |          |       |       |        |        |
| AG quadrature ( $m = 1$ )    | 76.27    | 62.46 | 19.31 | -20.02 | 0.48   |
| AG quadrature ( $m = 3$ )    | 36.01    | 51.43 | 14.62 | -21.09 | -41.89 |
| AG quadrature ( $m = 5$ )    | 37.42    | 40.25 | 15.84 | -20.35 | -43.03 |
| Cross-entropy ( $N = 1000$ ) | 40.12    | 30.98 | 21.35 | -9.52  | -58.81 |
| Cross-entropy ( $N = 2000$ ) | 40.86    | 31.19 | 22.11 | -8.94  | -58.34 |
| Cross-entropy ( $N = 5000$ ) | 40.90    | 31.31 | 22.01 | -8.75  | -58.11 |

**Table SM.43:** Bias for all the parameters of model (1) obtained by means of Monte Carlo simulations for various estimation techniques and various values of  $\sigma$  and for  $G = 50$  and  $n = 250$ . For each value of  $\sigma$ , the number of replications is equal to 200. All values of the bias are multiplied by 100.

|                              | $\sigma$ |        |        |        |        |
|------------------------------|----------|--------|--------|--------|--------|
|                              | 0.01     | 0.10   | 0.20   | 0.50   | 1.00   |
| RMSE of $\hat{\beta}_0$      |          |        |        |        |        |
| AG quadrature ( $m = 1$ )    | 14.44    | 13.54  | 13.72  | 15.39  | 14.62  |
| AG quadrature ( $m = 3$ )    | 14.44    | 13.55  | 13.72  | 15.39  | 14.62  |
| AG quadrature ( $m = 5$ )    | 14.44    | 13.55  | 13.72  | 15.39  | 14.62  |
| Cross-entropy ( $N = 1000$ ) | 14.35    | 13.54  | 13.71  | 15.40  | 14.74  |
| Cross-entropy ( $N = 2000$ ) | 14.41    | 13.46  | 13.80  | 15.44  | 14.66  |
| Cross-entropy ( $N = 5000$ ) | 14.39    | 13.52  | 13.71  | 15.42  | 14.58  |
| RMSE of $\hat{\beta}_1$      |          |        |        |        |        |
| AG quadrature ( $m = 1$ )    | 19.30    | 17.91  | 18.26  | 19.88  | 19.28  |
| AG quadrature ( $m = 3$ )    | 19.30    | 17.91  | 18.26  | 19.88  | 19.28  |
| AG quadrature ( $m = 5$ )    | 19.30    | 17.91  | 18.26  | 19.88  | 19.28  |
| Cross-entropy ( $N = 1000$ ) | 19.25    | 17.89  | 18.46  | 19.88  | 19.34  |
| Cross-entropy ( $N = 2000$ ) | 19.24    | 17.73  | 18.41  | 19.80  | 19.24  |
| Cross-entropy ( $N = 5000$ ) | 19.37    | 17.81  | 18.29  | 19.77  | 19.17  |
| RMSE of $\hat{\beta}_2$      |          |        |        |        |        |
| AG quadrature ( $m = 1$ )    | 27.70    | 24.24  | 24.26  | 25.28  | 26.25  |
| AG quadrature ( $m = 3$ )    | 27.70    | 24.24  | 24.26  | 25.28  | 26.25  |
| AG quadrature ( $m = 5$ )    | 27.70    | 24.24  | 24.26  | 25.28  | 26.25  |
| Cross-entropy ( $N = 1000$ ) | 27.65    | 24.05  | 24.29  | 25.56  | 26.40  |
| Cross-entropy ( $N = 2000$ ) | 27.62    | 24.14  | 24.49  | 25.42  | 26.29  |
| Cross-entropy ( $N = 5000$ ) | 27.70    | 24.21  | 24.31  | 25.20  | 26.08  |
| RMSE of $\hat{\beta}_3$      |          |        |        |        |        |
| AG quadrature ( $m = 1$ )    | 33.34    | 31.11  | 27.87  | 30.47  | 35.05  |
| AG quadrature ( $m = 3$ )    | 33.34    | 31.11  | 27.87  | 30.47  | 35.05  |
| AG quadrature ( $m = 5$ )    | 33.34    | 31.11  | 27.87  | 30.47  | 35.05  |
| Cross-entropy ( $N = 1000$ ) | 33.25    | 31.04  | 28.22  | 30.46  | 35.13  |
| Cross-entropy ( $N = 2000$ ) | 33.33    | 31.00  | 27.99  | 30.37  | 35.15  |
| Cross-entropy ( $N = 5000$ ) | 33.40    | 30.98  | 27.97  | 30.17  | 34.82  |
| RMSE of $\hat{\sigma}$       |          |        |        |        |        |
| AG quadrature ( $m = 1$ )    | 12.31    | 12.76  | 17.72  | 44.85  | 94.54  |
| AG quadrature ( $m = 3$ )    | 12.32    | 12.77  | 17.72  | 44.85  | 94.54  |
| AG quadrature ( $m = 5$ )    | 12.32    | 12.77  | 17.72  | 44.85  | 94.54  |
| Cross-entropy ( $N = 1000$ ) | 18.49    | 11.34  | 5.52   | 31.61  | 81.69  |
| Cross-entropy ( $N = 2000$ ) | 18.59    | 11.36  | 5.48   | 31.52  | 81.29  |
| Cross-entropy ( $N = 5000$ ) | 18.75    | 11.32  | 5.40   | 31.45  | 81.35  |
| Computing time               |          |        |        |        |        |
| AG quadrature ( $m = 1$ )    | 0.73     | 0.62   | 0.61   | 0.62   | 0.61   |
| AG quadrature ( $m = 3$ )    | 0.84     | 0.81   | 0.79   | 0.79   | 0.79   |
| AG quadrature ( $m = 5$ )    | 0.93     | 0.91   | 0.88   | 0.89   | 0.89   |
| Cross-entropy ( $N = 1000$ ) | 31.42    | 30.93  | 29.69  | 29.94  | 30.28  |
| Cross-entropy ( $N = 2000$ ) | 60.48    | 59.52  | 59.11  | 59.44  | 59.52  |
| Cross-entropy ( $N = 5000$ ) | 147.59   | 146.34 | 148.34 | 147.93 | 146.35 |

**Table SM.44:** Sample Root Mean Squared Error (RMSE) for all the parameters of model (1) and computing times obtained by means of Monte Carlo simulation for various estimation techniques and various values of  $\sigma$  and for  $G = 8$  and  $n = 1000$ . For each value of  $\sigma$ , the number of replications is equal to 200. All the values of the RMSE are multiplied by 100; computing times are in seconds.

|                              | $\sigma$ |       |        |        |        |
|------------------------------|----------|-------|--------|--------|--------|
|                              | 0.01     | 0.10  | 0.20   | 0.50   | 1.00   |
| Bias of $\hat{\beta}_0$      |          |       |        |        |        |
| AG quadrature ( $m = 1$ )    | 0.78     | 0.50  | 0.50   | 0.36   | 0.12   |
| AG quadrature ( $m = 3$ )    | 0.78     | 0.50  | 0.50   | 0.36   | 0.12   |
| AG quadrature ( $m = 5$ )    | 0.78     | 0.50  | 0.50   | 0.36   | 0.12   |
| Cross-entropy ( $N = 1000$ ) | 0.84     | 0.47  | 0.63   | 0.30   | 0.11   |
| Cross-entropy ( $N = 2000$ ) | 0.68     | 0.40  | 0.54   | 0.31   | 0.32   |
| Cross-entropy ( $N = 5000$ ) | 0.74     | 0.43  | 0.52   | 0.27   | 0.19   |
| Bias of $\hat{\beta}_1$      |          |       |        |        |        |
| AG quadrature ( $m = 1$ )    | 3.92     | 3.17  | 1.36   | 2.57   | 3.13   |
| AG quadrature ( $m = 3$ )    | 3.92     | 3.17  | 1.36   | 2.57   | 3.13   |
| AG quadrature ( $m = 5$ )    | 3.92     | 3.17  | 1.36   | 2.57   | 3.13   |
| Cross-entropy ( $N = 1000$ ) | 3.92     | 2.97  | 1.38   | 2.61   | 3.29   |
| Cross-entropy ( $N = 2000$ ) | 3.90     | 2.80  | 1.46   | 2.51   | 3.28   |
| Cross-entropy ( $N = 5000$ ) | 4.04     | 3.01  | 1.41   | 2.48   | 3.27   |
| Bias of $\hat{\beta}_2$      |          |       |        |        |        |
| AG quadrature ( $m = 1$ )    | 5.15     | 5.21  | 2.81   | 3.06   | 4.46   |
| AG quadrature ( $m = 3$ )    | 5.15     | 5.21  | 2.81   | 3.06   | 4.46   |
| AG quadrature ( $m = 5$ )    | 5.15     | 5.21  | 2.81   | 3.06   | 4.46   |
| Cross-entropy ( $N = 1000$ ) | 5.15     | 4.90  | 3.01   | 3.26   | 4.75   |
| Cross-entropy ( $N = 2000$ ) | 5.26     | 4.95  | 3.04   | 3.12   | 4.74   |
| Cross-entropy ( $N = 5000$ ) | 5.35     | 5.08  | 2.97   | 3.11   | 4.75   |
| Bias of $\hat{\beta}_3$      |          |       |        |        |        |
| AG quadrature ( $m = 1$ )    | 4.97     | 7.35  | 3.47   | 2.09   | 8.12   |
| AG quadrature ( $m = 3$ )    | 4.97     | 7.35  | 3.47   | 2.09   | 8.12   |
| AG quadrature ( $m = 5$ )    | 4.97     | 7.35  | 3.47   | 2.09   | 8.12   |
| Cross-entropy ( $N = 1000$ ) | 4.96     | 7.29  | 3.85   | 2.30   | 8.47   |
| Cross-entropy ( $N = 2000$ ) | 5.12     | 7.02  | 3.81   | 2.22   | 8.53   |
| Cross-entropy ( $N = 5000$ ) | 5.27     | 7.22  | 3.71   | 2.21   | 8.46   |
| Bias of $\hat{\sigma}$       |          |       |        |        |        |
| AG quadrature ( $m = 1$ )    | 5.57     | -1.54 | -14.19 | -43.51 | -93.96 |
| AG quadrature ( $m = 3$ )    | 5.58     | -1.54 | -14.19 | -43.51 | -93.96 |
| AG quadrature ( $m = 5$ )    | 5.58     | -1.54 | -14.19 | -43.51 | -93.96 |
| Cross-entropy ( $N = 1000$ ) | 17.71    | 9.82  | -1.48  | -31.17 | -81.53 |
| Cross-entropy ( $N = 2000$ ) | 17.79    | 9.81  | -1.41  | -31.10 | -81.11 |
| Cross-entropy ( $N = 5000$ ) | 17.96    | 9.88  | -1.26  | -31.02 | -81.19 |

**Table SM.45:** Bias for all the parameters of model (1) obtained by means of Monte Carlo simulation for various estimation techniques and various values of  $\sigma$  and for  $G = 8$  and  $n = 1000$ . For each value of  $\sigma$ , the number of replications is equal to 200. All the values of the bias are multiplied by 100.

|                              | $\sigma$ |        |        |        |        |
|------------------------------|----------|--------|--------|--------|--------|
|                              | 0.01     | 0.10   | 0.20   | 0.50   | 1.00   |
| RMSE of $\hat{\beta}_0$      |          |        |        |        |        |
| AG quadrature ( $m = 1$ )    | 14.47    | 15.07  | 13.29  | 13.96  | 15.00  |
| AG quadrature ( $m = 3$ )    | 14.47    | 15.07  | 13.29  | 13.96  | 15.00  |
| AG quadrature ( $m = 5$ )    | 14.47    | 15.07  | 13.29  | 13.96  | 15.00  |
| Cross-entropy ( $N = 1000$ ) | 14.57    | 15.13  | 13.48  | 13.94  | 15.05  |
| Cross-entropy ( $N = 2000$ ) | 14.38    | 15.07  | 13.23  | 13.91  | 14.89  |
| Cross-entropy ( $N = 5000$ ) | 14.35    | 15.06  | 13.21  | 14.01  | 15.00  |
| RMSE of $\hat{\beta}_1$      |          |        |        |        |        |
| AG quadrature ( $m = 1$ )    | 19.46    | 18.79  | 19.16  | 20.47  | 19.40  |
| AG quadrature ( $m = 3$ )    | 19.46    | 18.79  | 19.16  | 20.47  | 19.40  |
| AG quadrature ( $m = 5$ )    | 19.46    | 18.79  | 19.16  | 20.47  | 19.40  |
| Cross-entropy ( $N = 1000$ ) | 19.46    | 18.94  | 19.33  | 20.54  | 19.51  |
| Cross-entropy ( $N = 2000$ ) | 19.43    | 18.97  | 19.19  | 20.55  | 19.42  |
| Cross-entropy ( $N = 5000$ ) | 19.34    | 18.73  | 19.15  | 20.55  | 19.39  |
| RMSE of $\hat{\beta}_2$      |          |        |        |        |        |
| AG quadrature ( $m = 1$ )    | 25.81    | 25.52  | 24.21  | 23.90  | 24.29  |
| AG quadrature ( $m = 3$ )    | 25.82    | 25.52  | 24.21  | 23.90  | 24.29  |
| AG quadrature ( $m = 5$ )    | 25.82    | 25.52  | 24.21  | 23.90  | 24.29  |
| Cross-entropy ( $N = 1000$ ) | 25.51    | 25.63  | 24.27  | 24.13  | 24.19  |
| Cross-entropy ( $N = 2000$ ) | 25.43    | 25.45  | 23.93  | 24.07  | 24.28  |
| Cross-entropy ( $N = 5000$ ) | 25.50    | 25.29  | 24.00  | 24.02  | 24.26  |
| RMSE of $\hat{\beta}_3$      |          |        |        |        |        |
| AG quadrature ( $m = 1$ )    | 32.97    | 31.79  | 30.92  | 33.60  | 30.37  |
| AG quadrature ( $m = 3$ )    | 32.97    | 31.79  | 30.92  | 33.60  | 30.37  |
| AG quadrature ( $m = 5$ )    | 32.97    | 31.79  | 30.92  | 33.60  | 30.37  |
| Cross-entropy ( $N = 1000$ ) | 32.63    | 31.81  | 30.98  | 33.91  | 30.72  |
| Cross-entropy ( $N = 2000$ ) | 32.45    | 31.75  | 30.68  | 33.64  | 30.63  |
| Cross-entropy ( $N = 5000$ ) | 32.48    | 31.56  | 30.83  | 33.66  | 30.52  |
| RMSE of $\hat{\sigma}$       |          |        |        |        |        |
| AG quadrature ( $m = 1$ )    | 14.74    | 12.59  | 17.58  | 44.57  | 93.00  |
| AG quadrature ( $m = 3$ )    | 14.76    | 12.60  | 17.58  | 44.57  | 93.00  |
| AG quadrature ( $m = 5$ )    | 14.76    | 12.60  | 17.58  | 44.57  | 93.00  |
| Cross-entropy ( $N = 1000$ ) | 19.29    | 10.67  | 4.41   | 31.54  | 80.91  |
| Cross-entropy ( $N = 2000$ ) | 19.34    | 10.56  | 4.30   | 31.54  | 80.81  |
| Cross-entropy ( $N = 5000$ ) | 19.26    | 10.73  | 4.24   | 31.43  | 80.72  |
| Computing time               |          |        |        |        |        |
| AG quadrature ( $m = 1$ )    | 0.64     | 0.63   | 0.64   | 0.63   | 0.64   |
| AG quadrature ( $m = 3$ )    | 0.81     | 0.80   | 0.81   | 0.81   | 0.81   |
| AG quadrature ( $m = 5$ )    | 0.92     | 0.91   | 0.92   | 0.90   | 0.91   |
| Cross-entropy ( $N = 1000$ ) | 31.70    | 31.00  | 31.45  | 31.19  | 32.14  |
| Cross-entropy ( $N = 2000$ ) | 61.13    | 61.23  | 60.50  | 62.37  | 62.01  |
| Cross-entropy ( $N = 5000$ ) | 153.70   | 153.65 | 152.07 | 153.65 | 155.82 |

**Table SM.46:** Sample Root Mean Squared Error (RMSE) for all the parameters of model (1) and computing times obtained by means of Monte Carlo simulation for various estimation techniques and various values of  $\sigma$  and for  $G = 12$  and  $n = 1000$ . For each value of  $\sigma$ , the number of replications is equal to 200. All the values of the RMSE are multiplied by 100; computing times are in seconds.

|                              | $\sigma$ |       |        |        |        |
|------------------------------|----------|-------|--------|--------|--------|
|                              | 0.01     | 0.10  | 0.20   | 0.50   | 1.00   |
| Bias of $\hat{\beta}_0$      |          |       |        |        |        |
| AG quadrature ( $m = 1$ )    | 1.97     | 0.86  | 0.75   | 1.40   | 0.78   |
| AG quadrature ( $m = 3$ )    | 1.97     | 0.86  | 0.75   | 1.40   | 0.78   |
| AG quadrature ( $m = 5$ )    | 1.97     | 0.86  | 0.75   | 1.40   | 0.78   |
| Cross-entropy ( $N = 1000$ ) | 1.86     | 0.85  | 0.93   | 1.40   | 0.66   |
| Cross-entropy ( $N = 2000$ ) | 1.82     | 0.81  | 0.73   | 1.36   | 0.75   |
| Cross-entropy ( $N = 5000$ ) | 1.85     | 0.80  | 0.66   | 1.36   | 0.67   |
| Bias of $\hat{\beta}_1$      |          |       |        |        |        |
| AG quadrature ( $m = 1$ )    | 1.72     | 2.55  | 2.31   | 2.54   | 2.76   |
| AG quadrature ( $m = 3$ )    | 1.72     | 2.55  | 2.31   | 2.54   | 2.76   |
| AG quadrature ( $m = 5$ )    | 1.72     | 2.55  | 2.31   | 2.54   | 2.76   |
| Cross-entropy ( $N = 1000$ ) | 1.63     | 2.50  | 2.48   | 2.64   | 2.63   |
| Cross-entropy ( $N = 2000$ ) | 1.44     | 2.50  | 2.37   | 2.48   | 2.72   |
| Cross-entropy ( $N = 5000$ ) | 1.46     | 2.44  | 2.29   | 2.59   | 2.61   |
| Bias of $\hat{\beta}_2$      |          |       |        |        |        |
| AG quadrature ( $m = 1$ )    | 4.23     | 2.28  | 3.38   | 4.92   | 4.15   |
| AG quadrature ( $m = 3$ )    | 4.23     | 2.28  | 3.38   | 4.92   | 4.15   |
| AG quadrature ( $m = 5$ )    | 4.23     | 2.28  | 3.38   | 4.92   | 4.15   |
| Cross-entropy ( $N = 1000$ ) | 4.20     | 2.32  | 3.60   | 5.13   | 4.14   |
| Cross-entropy ( $N = 2000$ ) | 3.99     | 2.19  | 3.53   | 4.86   | 4.20   |
| Cross-entropy ( $N = 5000$ ) | 4.00     | 2.15  | 3.43   | 4.98   | 3.98   |
| Bias of $\hat{\beta}_3$      |          |       |        |        |        |
| AG quadrature ( $m = 1$ )    | 4.55     | 3.77  | 6.20   | 7.40   | 5.40   |
| AG quadrature ( $m = 3$ )    | 4.56     | 3.77  | 6.20   | 7.40   | 5.40   |
| AG quadrature ( $m = 5$ )    | 4.56     | 3.77  | 6.20   | 7.40   | 5.40   |
| Cross-entropy ( $N = 1000$ ) | 4.51     | 3.89  | 6.55   | 7.68   | 5.43   |
| Cross-entropy ( $N = 2000$ ) | 4.28     | 3.77  | 6.33   | 7.36   | 5.59   |
| Cross-entropy ( $N = 5000$ ) | 4.26     | 3.63  | 6.30   | 7.54   | 5.23   |
| Bias of $\hat{\sigma}$       |          |       |        |        |        |
| AG quadrature ( $m = 1$ )    | 7.29     | -1.56 | -13.28 | -43.21 | -92.20 |
| AG quadrature ( $m = 3$ )    | 7.30     | -1.55 | -13.27 | -43.20 | -92.19 |
| AG quadrature ( $m = 5$ )    | 7.30     | -1.55 | -13.27 | -43.20 | -92.19 |
| Cross-entropy ( $N = 1000$ ) | 18.77    | 9.72  | -1.14  | -31.24 | -80.79 |
| Cross-entropy ( $N = 2000$ ) | 18.80    | 9.54  | -0.97  | -31.23 | -80.68 |
| Cross-entropy ( $N = 5000$ ) | 18.77    | 9.76  | -0.99  | -31.12 | -80.60 |

**Table SM.47:** Bias for all the parameters of model (1) obtained by means of Monte Carlo simulation for various estimation techniques and various values of  $\sigma$  and for  $G = 12$  and  $n = 1000$ . For each value of  $\sigma$ , the number of replications is equal to 200. All the values of the bias are multiplied by 100.



| RMSE of $\hat{\beta}_0$      | $\sigma$ |        |        |        |        |
|------------------------------|----------|--------|--------|--------|--------|
|                              | 0.01     | 0.10   | 0.20   | 0.50   | 1.00   |
| AG quadrature ( $m = 1$ )    | 13.63    | 14.98  | 14.96  | 14.61  | 14.06  |
| AG quadrature ( $m = 3$ )    | 13.63    | 14.98  | 14.96  | 14.61  | 14.06  |
| AG quadrature ( $m = 5$ )    | 13.63    | 14.98  | 14.96  | 14.61  | 14.06  |
| Cross-entropy ( $N = 1000$ ) | 13.65    | 15.05  | 14.88  | 14.58  | 14.11  |
| Cross-entropy ( $N = 2000$ ) | 13.52    | 14.90  | 14.79  | 14.64  | 14.00  |
| Cross-entropy ( $N = 5000$ ) | 13.58    | 15.02  | 14.86  | 14.57  | 14.02  |
| RMSE of $\hat{\beta}_1$      |          |        |        |        |        |
| AG quadrature ( $m = 1$ )    | 18.31    | 22.00  | 19.77  | 21.44  | 18.56  |
| AG quadrature ( $m = 3$ )    | 18.31    | 22.01  | 19.77  | 21.45  | 18.56  |
| AG quadrature ( $m = 5$ )    | 18.31    | 22.01  | 19.77  | 21.45  | 18.56  |
| Cross-entropy ( $N = 1000$ ) | 18.21    | 21.69  | 19.81  | 21.19  | 18.57  |
| Cross-entropy ( $N = 2000$ ) | 18.20    | 21.62  | 19.61  | 20.95  | 18.38  |
| Cross-entropy ( $N = 5000$ ) | 18.28    | 21.65  | 19.65  | 20.86  | 18.39  |
| RMSE of $\hat{\beta}_2$      |          |        |        |        |        |
| AG quadrature ( $m = 1$ )    | 23.64    | 25.12  | 28.53  | 27.92  | 25.83  |
| AG quadrature ( $m = 3$ )    | 23.65    | 25.13  | 28.53  | 27.93  | 25.83  |
| AG quadrature ( $m = 5$ )    | 23.65    | 25.13  | 28.54  | 27.93  | 25.83  |
| Cross-entropy ( $N = 1000$ ) | 23.42    | 24.90  | 28.16  | 27.67  | 25.49  |
| Cross-entropy ( $N = 2000$ ) | 23.52    | 24.89  | 28.14  | 27.43  | 25.25  |
| Cross-entropy ( $N = 5000$ ) | 23.43    | 24.82  | 28.23  | 27.32  | 25.33  |
| RMSE of $\hat{\beta}_3$      |          |        |        |        |        |
| AG quadrature ( $m = 1$ )    | 29.56    | 32.52  | 34.94  | 34.80  | 34.00  |
| AG quadrature ( $m = 3$ )    | 29.56    | 32.52  | 34.94  | 34.80  | 34.00  |
| AG quadrature ( $m = 5$ )    | 29.56    | 32.52  | 34.94  | 34.81  | 34.00  |
| Cross-entropy ( $N = 1000$ ) | 29.59    | 32.14  | 34.70  | 34.01  | 33.53  |
| Cross-entropy ( $N = 2000$ ) | 29.42    | 31.95  | 34.39  | 33.88  | 33.45  |
| Cross-entropy ( $N = 5000$ ) | 29.57    | 32.06  | 34.59  | 33.86  | 33.37  |
| RMSE of $\hat{\sigma}$       |          |        |        |        |        |
| AG quadrature ( $m = 1$ )    | 17.33    | 14.20  | 18.71  | 41.63  | 89.21  |
| AG quadrature ( $m = 3$ )    | 17.37    | 14.23  | 18.72  | 41.61  | 89.19  |
| AG quadrature ( $m = 5$ )    | 17.37    | 14.23  | 18.72  | 41.61  | 89.19  |
| Cross-entropy ( $N = 1000$ ) | 19.30    | 10.22  | 3.37   | 29.98  | 79.79  |
| Cross-entropy ( $N = 2000$ ) | 19.20    | 10.11  | 3.24   | 29.83  | 79.66  |
| Cross-entropy ( $N = 5000$ ) | 19.26    | 10.29  | 3.19   | 29.66  | 79.57  |
| Computing time               |          |        |        |        |        |
| AG quadrature ( $m = 1$ )    | 0.67     | 0.66   | 0.67   | 0.67   | 0.68   |
| AG quadrature ( $m = 3$ )    | 0.84     | 0.86   | 0.87   | 0.85   | 0.86   |
| AG quadrature ( $m = 5$ )    | 0.96     | 0.96   | 0.97   | 0.97   | 0.98   |
| Cross-entropy ( $N = 1000$ ) | 37.56    | 37.63  | 38.18  | 38.25  | 37.95  |
| Cross-entropy ( $N = 2000$ ) | 73.76    | 74.02  | 74.62  | 75.40  | 74.79  |
| Cross-entropy ( $N = 5000$ ) | 182.87   | 181.81 | 183.77 | 181.28 | 183.17 |

**Table SM.48:** Sample Root Mean Squared Error (RMSE) for all the parameters of model (1) obtained by means of Monte Carlo simulations for various estimation techniques and various values of  $\sigma$  and for  $G = 25$  and  $n = 1000$ . For each value of  $\sigma$ , the number of replications is equal to 200. All values of the RMSE are multiplied by 100.

| Bias of $\hat{\beta}_0$      | $\sigma$ |       |        |        |        |
|------------------------------|----------|-------|--------|--------|--------|
|                              | 0.01     | 0.10  | 0.20   | 0.50   | 1.00   |
| AG quadrature ( $m = 1$ )    | 0.79     | 1.43  | 2.89   | 3.68   | 1.70   |
| AG quadrature ( $m = 3$ )    | 0.79     | 1.43  | 2.89   | 3.68   | 1.71   |
| AG quadrature ( $m = 5$ )    | 0.79     | 1.43  | 2.89   | 3.68   | 1.71   |
| Cross-entropy ( $N = 1000$ ) | 0.43     | 1.12  | 2.73   | 3.32   | 1.51   |
| Cross-entropy ( $N = 2000$ ) | 0.60     | 1.23  | 2.57   | 3.41   | 1.37   |
| Cross-entropy ( $N = 5000$ ) | 0.57     | 1.27  | 2.63   | 3.45   | 1.35   |
| Bias of $\hat{\beta}_1$      |          |       |        |        |        |
| AG quadrature ( $m = 1$ )    | 2.09     | 4.09  | 4.16   | 6.17   | 3.68   |
| AG quadrature ( $m = 3$ )    | 2.09     | 4.09  | 4.16   | 6.18   | 3.69   |
| AG quadrature ( $m = 5$ )    | 2.09     | 4.09  | 4.16   | 6.18   | 3.69   |
| Cross-entropy ( $N = 1000$ ) | 1.53     | 3.71  | 3.85   | 5.75   | 2.96   |
| Cross-entropy ( $N = 2000$ ) | 1.57     | 3.81  | 3.70   | 5.50   | 3.10   |
| Cross-entropy ( $N = 5000$ ) | 1.74     | 3.72  | 3.74   | 5.54   | 2.97   |
| Bias of $\hat{\beta}_2$      |          |       |        |        |        |
| AG quadrature ( $m = 1$ )    | 2.61     | 5.10  | 6.59   | 9.62   | 6.71   |
| AG quadrature ( $m = 3$ )    | 2.62     | 5.10  | 6.59   | 9.63   | 6.71   |
| AG quadrature ( $m = 5$ )    | 2.62     | 5.10  | 6.59   | 9.63   | 6.72   |
| Cross-entropy ( $N = 1000$ ) | 2.21     | 4.57  | 6.02   | 8.64   | 5.68   |
| Cross-entropy ( $N = 2000$ ) | 2.13     | 4.68  | 5.96   | 8.64   | 5.80   |
| Cross-entropy ( $N = 5000$ ) | 2.17     | 4.68  | 6.05   | 8.63   | 5.81   |
| Bias of $\hat{\beta}_3$      |          |       |        |        |        |
| AG quadrature ( $m = 1$ )    | 3.80     | 7.50  | 9.97   | 12.24  | 9.19   |
| AG quadrature ( $m = 3$ )    | 3.80     | 7.51  | 9.97   | 12.25  | 9.20   |
| AG quadrature ( $m = 5$ )    | 3.80     | 7.51  | 9.98   | 12.25  | 9.20   |
| Cross-entropy ( $N = 1000$ ) | 3.20     | 6.88  | 9.23   | 11.00  | 8.01   |
| Cross-entropy ( $N = 2000$ ) | 3.15     | 6.85  | 9.18   | 11.00  | 8.13   |
| Cross-entropy ( $N = 5000$ ) | 3.31     | 6.99  | 9.38   | 11.02  | 7.92   |
| Bias of $\hat{\sigma}$       |          |       |        |        |        |
| AG quadrature ( $m = 1$ )    | 9.22     | -1.02 | -10.15 | -38.31 | -87.83 |
| AG quadrature ( $m = 3$ )    | 9.24     | -1.00 | -10.13 | -38.29 | -87.80 |
| AG quadrature ( $m = 5$ )    | 9.24     | -1.00 | -10.13 | -38.28 | -87.80 |
| Cross-entropy ( $N = 1000$ ) | 19.05    | 9.68  | 0.00   | -29.80 | -79.73 |
| Cross-entropy ( $N = 2000$ ) | 18.98    | 9.65  | 0.08   | -29.67 | -79.61 |
| Cross-entropy ( $N = 5000$ ) | 19.07    | 9.87  | 0.17   | -29.49 | -79.51 |

**Table SM.49:** Bias for all the parameters of model (1) obtained by means of Monte Carlo simulation for various estimation techniques and various values of  $\sigma$  and for  $G = 25$  and  $n = 1000$ . For each value of  $\sigma$ , the number of replications is equal to 200. All the values of the bias are multiplied by 100.

| RMSE of $\hat{\beta}_0$      | $\sigma$ |        |        |        |        |
|------------------------------|----------|--------|--------|--------|--------|
|                              | 0.01     | 0.10   | 0.20   | 0.50   | 1.00   |
| AG quadrature ( $m = 1$ )    | 13.84    | 14.26  | 13.83  | 13.20  | 15.69  |
| AG quadrature ( $m = 3$ )    | 13.85    | 14.27  | 13.83  | 13.21  | 15.70  |
| AG quadrature ( $m = 5$ )    | 13.85    | 14.27  | 13.83  | 13.21  | 15.70  |
| Cross-entropy ( $N = 1000$ ) | 13.60    | 13.95  | 13.75  | 13.16  | 15.37  |
| Cross-entropy ( $N = 2000$ ) | 13.52    | 13.77  | 13.64  | 13.05  | 15.42  |
| Cross-entropy ( $N = 5000$ ) | 13.62    | 13.84  | 13.56  | 13.00  | 15.39  |
| RMSE of $\hat{\beta}_1$      |          |        |        |        |        |
| AG quadrature ( $m = 1$ )    | 20.56    | 21.40  | 19.85  | 20.23  | 20.30  |
| AG quadrature ( $m = 3$ )    | 20.57    | 21.41  | 19.86  | 20.23  | 20.31  |
| AG quadrature ( $m = 5$ )    | 20.57    | 21.42  | 19.86  | 20.24  | 20.31  |
| Cross-entropy ( $N = 1000$ ) | 19.61    | 20.68  | 19.02  | 19.49  | 19.88  |
| Cross-entropy ( $N = 2000$ ) | 19.78    | 20.60  | 19.01  | 19.23  | 19.85  |
| Cross-entropy ( $N = 5000$ ) | 19.72    | 20.49  | 19.07  | 19.24  | 19.85  |
| RMSE of $\hat{\beta}_2$      |          |        |        |        |        |
| AG quadrature ( $m = 1$ )    | 25.09    | 26.65  | 24.69  | 25.18  | 27.61  |
| AG quadrature ( $m = 3$ )    | 25.10    | 26.67  | 24.71  | 25.19  | 27.62  |
| AG quadrature ( $m = 5$ )    | 25.10    | 26.67  | 24.71  | 25.19  | 27.62  |
| Cross-entropy ( $N = 1000$ ) | 23.19    | 25.27  | 23.72  | 24.48  | 27.39  |
| Cross-entropy ( $N = 2000$ ) | 23.63    | 25.39  | 23.70  | 24.41  | 27.01  |
| Cross-entropy ( $N = 5000$ ) | 23.55    | 25.51  | 23.75  | 24.41  | 26.98  |
| RMSE of $\hat{\beta}_3$      |          |        |        |        |        |
| AG quadrature ( $m = 1$ )    | 32.33    | 35.02  | 32.60  | 31.61  | 32.65  |
| AG quadrature ( $m = 3$ )    | 32.35    | 35.05  | 32.62  | 31.63  | 32.67  |
| AG quadrature ( $m = 5$ )    | 32.35    | 35.06  | 32.62  | 31.64  | 32.67  |
| Cross-entropy ( $N = 1000$ ) | 30.59    | 33.18  | 31.08  | 29.85  | 32.05  |
| Cross-entropy ( $N = 2000$ ) | 30.63    | 33.37  | 31.23  | 29.78  | 31.91  |
| Cross-entropy ( $N = 5000$ ) | 30.75    | 33.43  | 31.33  | 29.88  | 31.91  |
| RMSE of $\hat{\sigma}$       |          |        |        |        |        |
| AG quadrature ( $m = 1$ )    | 21.85    | 18.72  | 18.68  | 42.38  | 89.51  |
| AG quadrature ( $m = 3$ )    | 21.94    | 18.81  | 18.73  | 42.36  | 89.47  |
| AG quadrature ( $m = 5$ )    | 21.95    | 18.83  | 18.74  | 42.36  | 89.47  |
| Cross-entropy ( $N = 1000$ ) | 19.03    | 10.43  | 2.40   | 30.21  | 79.75  |
| Cross-entropy ( $N = 2000$ ) | 19.33    | 10.55  | 2.32   | 30.10  | 79.84  |
| Cross-entropy ( $N = 5000$ ) | 19.43    | 10.54  | 2.24   | 29.99  | 79.65  |
| Computing time               |          |        |        |        |        |
| AG quadrature ( $m = 1$ )    | 0.71     | 0.72   | 0.71   | 0.71   | 0.71   |
| AG quadrature ( $m = 3$ )    | 0.91     | 0.90   | 0.90   | 0.90   | 0.89   |
| AG quadrature ( $m = 5$ )    | 1.02     | 1.01   | 1.03   | 1.01   | 1.02   |
| Cross-entropy ( $N = 1000$ ) | 49.01    | 45.23  | 45.13  | 45.38  | 44.43  |
| Cross-entropy ( $N = 2000$ ) | 97.30    | 88.74  | 88.18  | 88.49  | 88.56  |
| Cross-entropy ( $N = 5000$ ) | 224.44   | 221.45 | 222.62 | 219.23 | 222.36 |

**Table SM.50:** Sample Root Mean Squared Error (RMSE) for all the parameters of model (1) obtained by means of Monte Carlo simulations for various estimation techniques and various values of  $\sigma$  and for  $G = 50$  and  $n = 1000$ . For each value of  $\sigma$ , the number of replications is equal to 200. All values of the RMSE are multiplied by 100.

| Bias of $\hat{\beta}_0$      | $\sigma$ |       |       |        |        |
|------------------------------|----------|-------|-------|--------|--------|
|                              | 0.01     | 0.10  | 0.20  | 0.50   | 1.00   |
| AG quadrature ( $m = 1$ )    | 2.07     | 2.64  | 2.48  | 1.97   | 1.37   |
| AG quadrature ( $m = 3$ )    | 2.08     | 2.65  | 2.49  | 1.98   | 1.37   |
| AG quadrature ( $m = 5$ )    | 2.08     | 2.65  | 2.49  | 1.98   | 1.37   |
| Cross-entropy ( $N = 1000$ ) | 1.44     | 2.08  | 1.74  | 1.51   | 0.89   |
| Cross-entropy ( $N = 2000$ ) | 1.53     | 2.00  | 1.90  | 1.37   | 0.86   |
| Cross-entropy ( $N = 5000$ ) | 1.59     | 2.12  | 1.94  | 1.41   | 0.90   |
| Bias of $\hat{\beta}_1$      |          |       |       |        |        |
| AG quadrature ( $m = 1$ )    | 1.71     | 5.38  | 5.42  | 3.92   | 4.82   |
| AG quadrature ( $m = 3$ )    | 1.72     | 5.39  | 5.43  | 3.93   | 4.83   |
| AG quadrature ( $m = 5$ )    | 1.72     | 5.39  | 5.43  | 3.93   | 4.83   |
| Cross-entropy ( $N = 1000$ ) | 0.65     | 4.35  | 4.44  | 2.93   | 3.97   |
| Cross-entropy ( $N = 2000$ ) | 0.83     | 4.39  | 4.25  | 3.04   | 3.77   |
| Cross-entropy ( $N = 5000$ ) | 0.81     | 4.32  | 4.33  | 2.82   | 3.73   |
| Bias of $\hat{\beta}_2$      |          |       |       |        |        |
| AG quadrature ( $m = 1$ )    | 4.88     | 7.28  | 4.67  | 5.14   | 7.12   |
| AG quadrature ( $m = 3$ )    | 4.89     | 7.30  | 4.69  | 5.15   | 7.13   |
| AG quadrature ( $m = 5$ )    | 4.90     | 7.30  | 4.69  | 5.16   | 7.14   |
| Cross-entropy ( $N = 1000$ ) | 3.13     | 5.62  | 3.10  | 3.61   | 6.00   |
| Cross-entropy ( $N = 2000$ ) | 3.39     | 5.60  | 3.15  | 3.67   | 5.88   |
| Cross-entropy ( $N = 5000$ ) | 3.47     | 5.85  | 3.18  | 3.63   | 5.68   |
| Bias of $\hat{\beta}_3$      |          |       |       |        |        |
| AG quadrature ( $m = 1$ )    | 6.74     | 10.00 | 8.80  | 5.57   | 8.17   |
| AG quadrature ( $m = 3$ )    | 6.76     | 10.03 | 8.83  | 5.59   | 8.19   |
| AG quadrature ( $m = 5$ )    | 6.77     | 10.04 | 8.83  | 5.60   | 8.19   |
| Cross-entropy ( $N = 1000$ ) | 4.68     | 7.99  | 6.81  | 3.65   | 6.60   |
| Cross-entropy ( $N = 2000$ ) | 4.81     | 8.17  | 6.79  | 3.73   | 6.50   |
| Cross-entropy ( $N = 5000$ ) | 5.04     | 8.07  | 6.96  | 3.70   | 6.42   |
| Bias of $\hat{\sigma}$       |          |       |       |        |        |
| AG quadrature ( $m = 1$ )    | 11.60    | 2.95  | -6.02 | -38.15 | -87.70 |
| AG quadrature ( $m = 3$ )    | 11.65    | 3.02  | -5.95 | -38.10 | -87.64 |
| AG quadrature ( $m = 5$ )    | 11.66    | 3.03  | -5.94 | -38.09 | -87.63 |
| Cross-entropy ( $N = 1000$ ) | 18.87    | 10.10 | 0.21  | -30.10 | -79.71 |
| Cross-entropy ( $N = 2000$ ) | 19.16    | 10.28 | 0.41  | -30.00 | -79.81 |
| Cross-entropy ( $N = 5000$ ) | 19.29    | 10.28 | 0.47  | -29.89 | -79.63 |

**Table SM.51:** Bias for all the parameters of model (1) obtained by means of Monte Carlo simulations for various estimation techniques and various values of  $\sigma$  and for  $G = 50$  and  $n = 1000$ . For each value of  $\sigma$ , the number of replications is equal to 200. All values of the bias are multiplied by 100.

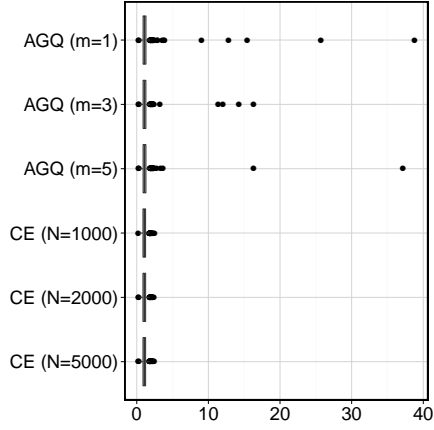

**Figure SM.1:** Boxplots of  $\hat{\beta}_1$  for models with  $G = 50$  and  $\sigma = 1$  according to the estimation method.

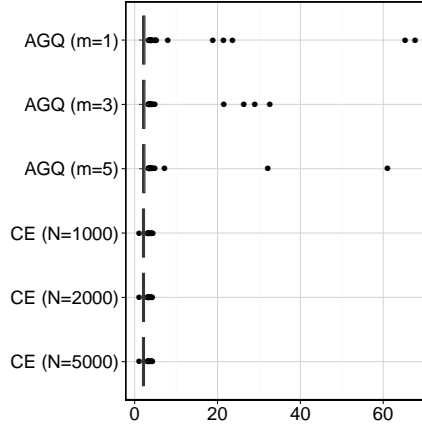

**Figure SM.2:** Boxplots of  $\hat{\beta}_2$  for models with  $G = 50$  and  $\sigma = 1$  according to the estimation method.

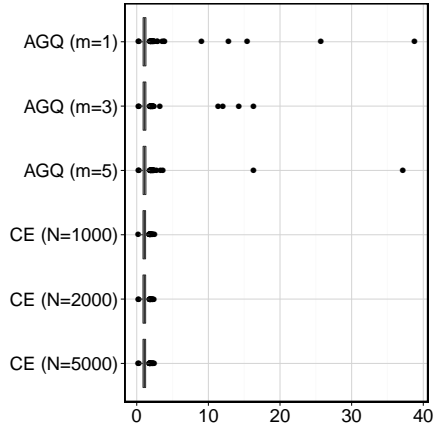

**Figure SM.3:** Boxplots of  $\hat{\beta}_3$  for models with  $G = 50$  and  $\sigma = 1$  according to the estimation method.

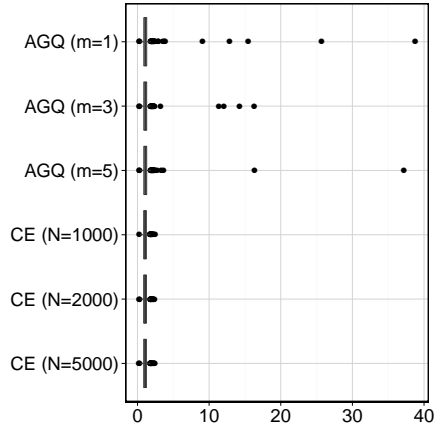

**Figure SM.4:** Boxplots of  $\hat{\beta}_4$  for models with  $G = 50$  and  $\sigma = 1$  according to the estimation method.

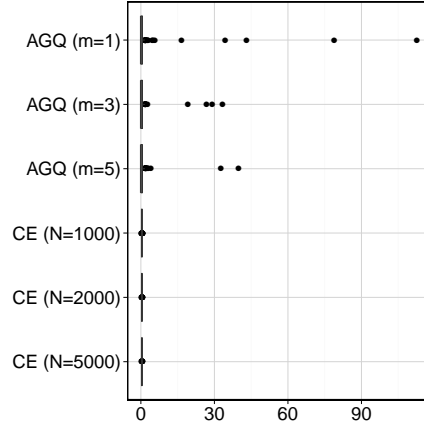

**Figure SM.5:** Boxplots of  $\hat{\sigma}$  for models with  $G = 50$  and  $\sigma = 1$  according to the estimation method.

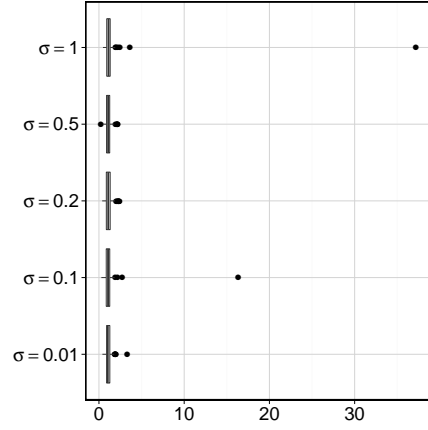

**Figure SM.6:** Boxplots of  $\hat{\beta}_1$  for models with  $G = 50$  and various values of  $\sigma$ , estimated by means of AGQ with  $m = 5$ .

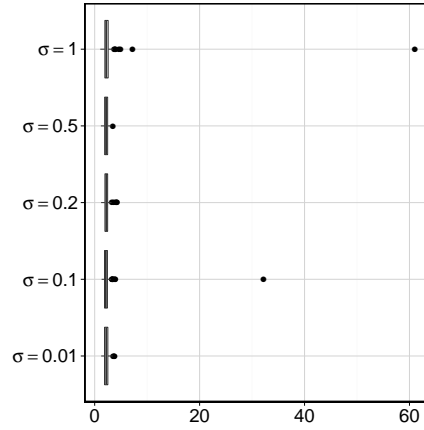

**Figure SM.7:** Boxplots of  $\hat{\beta}_2$  for models with  $G = 50$  and various values of  $\sigma$ , estimated by means of AGQ with  $m = 5$ .

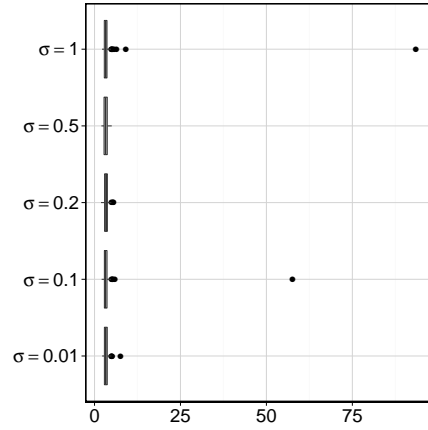

**Figure SM.8:** Boxplots of  $\hat{\beta}_3$  for models with  $G = 50$  and various values of  $\sigma$ , estimated by means of AGQ with  $m = 5$ .

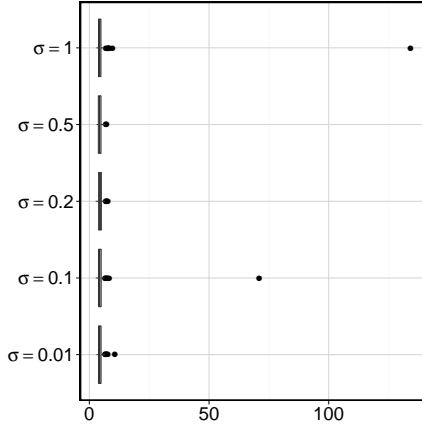

**Figure SM.9:** Boxplots of  $\hat{\beta}_4$  for models with  $G = 50$  and various values of  $\sigma$ , estimated by means of AGQ with  $m = 5$ .

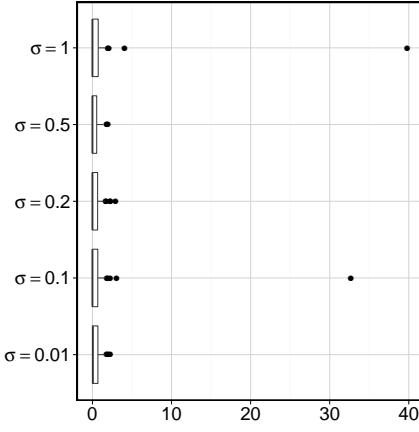

**Figure SM.10:** Boxplots of  $\hat{\sigma}$  for models with  $G = 50$  and various values of  $\sigma$ , estimated by means of AGQ with  $m = 5$ .

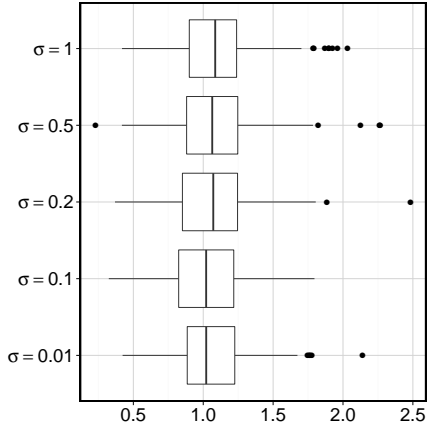

**Figure SM.11:** Boxplots of  $\hat{\beta}_1$  for models with  $G = 50$  and various values of  $\sigma$ , estimated by means of the cross-entropy algorithm with  $N = 1000$ .

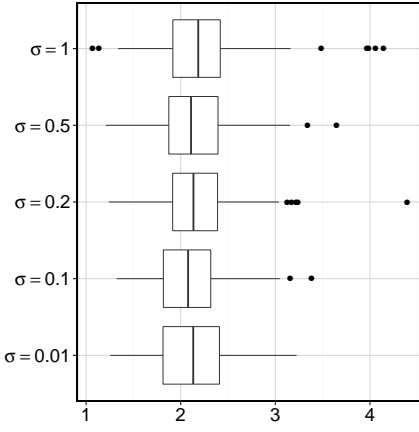

**Figure SM.12:** Boxplots of  $\hat{\beta}_2$  for models with  $G = 50$  and various values of  $\sigma$ , estimated by means of the cross-entropy algorithm with  $N = 1000$ .

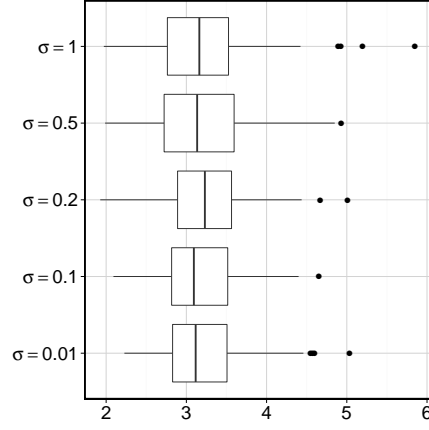

**Figure SM.13:** Boxplots of  $\hat{\beta}_3$  for models with  $G = 50$  and various values of  $\sigma$ , estimated by means of the cross-entropy algorithm with  $N = 1000$ .

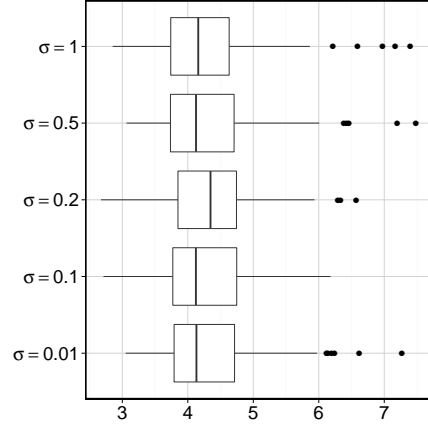

**Figure SM.14:** Boxplots of  $\hat{\beta}_4$  for models with  $G = 50$  and various values of  $\sigma$ , estimated by means of the cross-entropy algorithm with  $N = 1000$ .

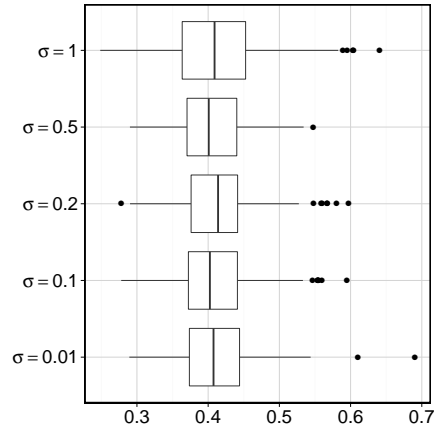

**Figure SM.15:** Boxplots of  $\hat{\sigma}$  for models with  $G = 50$  and various values of  $\sigma$ , estimated by means of the cross-entropy algorithm with  $N = 1000$ .
